# Supplementary material for: Target–ligand binding affinity from single point enthalpy calculation and elemental composition
Source: Royal Society of Chemistry journal article supplement (doi:10.1039/d3cp04483a), 2023-01-01
Supplement: d3cp04483a1.pdf [file d3cp04483a1.pdf]

## Supplementary Information

### Target-ligand binding affinity from single point enthalpy calculation and elemental composition

Viktor Szél, Balázs Zoltán Zsidó, Norbert Jeszenői, and Csaba Hetényi\*

*Pharmacoinformatics Unit, Department of Pharmacology and Pharmacotherapy, Medical School, University of Pécs, Szigeti út 12, 7624 Pécs, Hungary. \*Corresponding author.*

#### Table of contents

|                                                                                                                                                                                                     |    |
|-----------------------------------------------------------------------------------------------------------------------------------------------------------------------------------------------------|----|
| Fig. S1 Assignment of water molecules in the Hybrid Models .....                                                                                                                                    | 2  |
| Fig. S2 Comparison of the performance of hydration models used for single point calculation of binding enthalpy (N=43) ( $\beta=0$ ) .....                                                          | 3  |
| Table S1 Target-ligand systems.....                                                                                                                                                                 | 4  |
| Table S2 Charges of fragmented complexes and their target-ligand constituents separately .....                                                                                                      | 6  |
| Table S3 Correlation matrix for shortlisted descriptors .....                                                                                                                                       | 7  |
| Table S4 Regression parameters and residuals for the different binding enthalpy models assuming $\beta=0$ (N=31, tailored set) .....                                                                | 8  |
| Table S5 Construction of the tailored set of the $\Delta H_b$ model .....                                                                                                                           | 9  |
| Table S6 Measurement methods of protein concentration for ITC experiments .....                                                                                                                     | 10 |
| Table S7 Regression parameters and residuals for the different binding enthalpy models assuming $\beta=0$ (N=43, full set).....                                                                     | 11 |
| Table S8 Regression parameters and residuals for the different binding enthalpy models assuming $\beta\neq 0$ (N=43, full set).....                                                                 | 13 |
| Table S9 Regression parameters and residuals for the different binding enthalpy models assuming $\beta\neq 0$ (N=31, tailored set).....                                                             | 15 |
| Table S12 Ligand-based descriptors generated with PaDEL program package. ....                                                                                                                       | 18 |
| Table S13 Correlation of filtered descriptors with binding free energy ( $\Delta G_b$ ) and calculated reaction enthalpy ( $\Delta_r H$ ).....                                                      | 23 |
| Table S14 Multiple linear regression results for $\Delta G_b$ models with calculated $\Delta_r H$ ( $\alpha_1$ in Eq. 3) and selected ligand-based descriptors ( $\alpha_2$ ) NHA/NA or NHB/NB..... | 24 |
| Table S15 Values of descriptors used in regression models for binding free energy estimation .....                                                                                                  | 25 |

## Figures

Hybrid 1

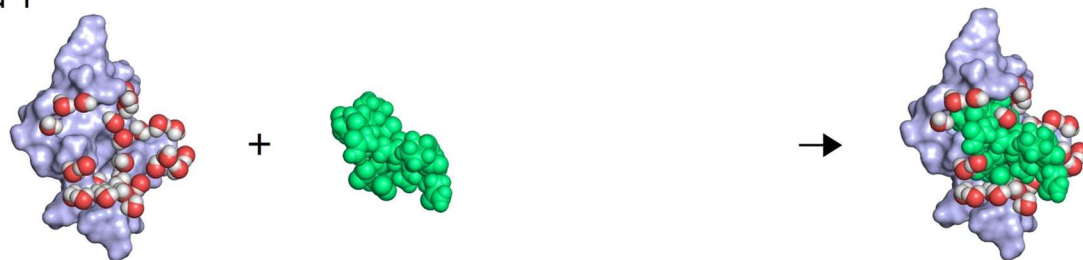

Hybrid 2

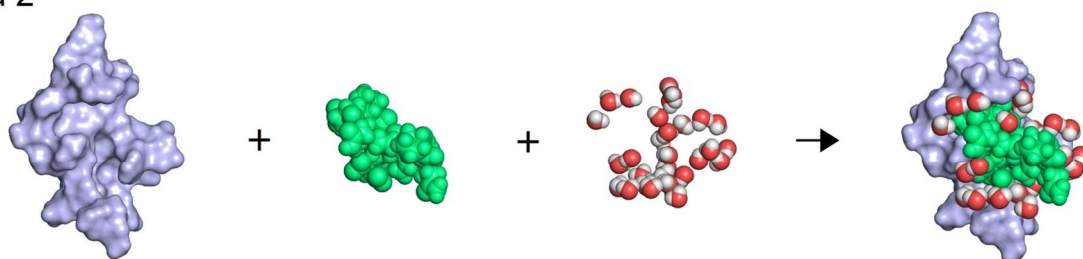

Hybrid 3

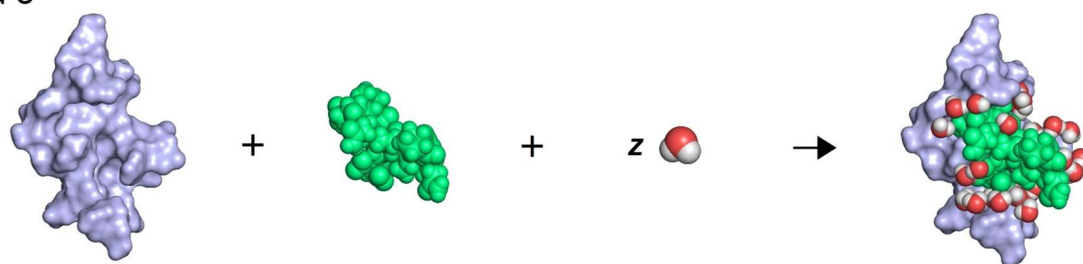

Target

Ligand

Complex

**Fig. S1 Assignment of water molecules in the Hybrid Models**

The number of waters assigned to the target, ligand or to the bulk are denoted by  $x$ ,  $y$ ,  $z$  respectively in **Eq. 2**. In Hybrid Model 1, interfacial waters are assigned to the target molecule ( $y = z = 0$ ,  $x \neq 0$ ) in their ligand-bound orientation on the reactant (left) side. Upon complex formation, the ligand binds to the hydrated target structure. This model does not account for the re-orientation of water molecules during ligand binding. In Hybrid Model 2 ( $x = y = 0$ ,  $z \neq 0$ :waters in cluster), water molecules are treated together as a cluster on the reactant (left) side, and the complex is formally assembled from three components, the target, the ligand, and the water cluster. This model does not account for the enthalpy change corresponding to interfacial water-water interactions. In Hybrid Model 3 ( $x = y = 0$ ,  $z \neq 0$ :individual waters), no interaction between interfacial waters and the target was assumed on the reactant (left) side.

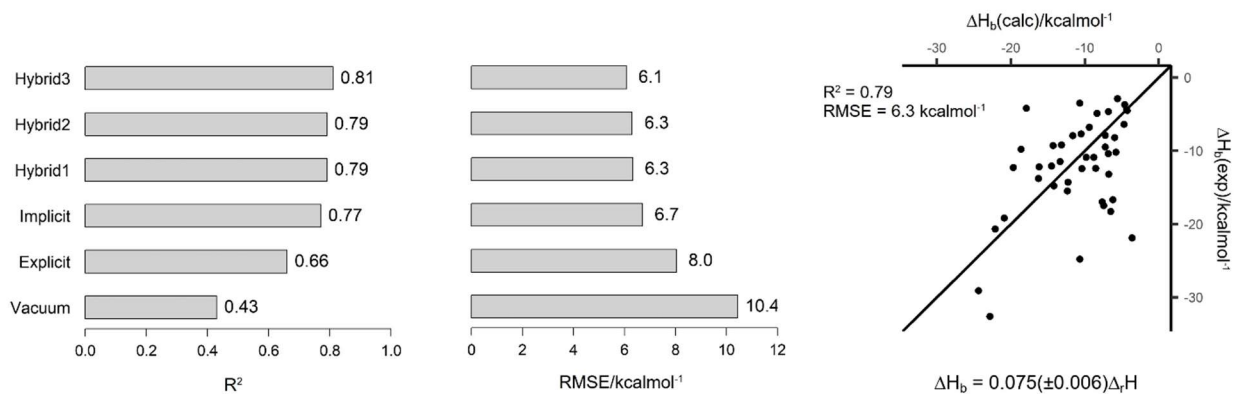

**Fig. S2 Comparison of the performance of hydration models used for single point calculation of binding enthalpy.**  $R^2$  (left) and RMSE (middle) values of linear regressions ( $\beta=0$ ) between calculated and experimental binding enthalpies are shown for the full ( $N=43$ ) data set. On the right correlation plots between calculated and experimental binding enthalpies obtained are also shown for the best model (Hybrid 1). Regression equations with values  $\alpha(\pm\Delta\alpha)$  are displayed below.

## Tables

### Table S1 Target-ligand systems

| System (PDB)            | Resolution [Å] | Target                                       | Ligand                               | MW (ligand) | #Waters <sup>f</sup> | $\Delta H_b(\text{exp})$ [kcal/mol] | $\Delta G_b(\text{exp})$ [kcal/mol] |
|-------------------------|----------------|----------------------------------------------|--------------------------------------|-------------|----------------------|-------------------------------------|-------------------------------------|
| 3ptb                    | 1.7            | beta trypsin                                 | benzamidine                          | 121.2       | 7                    | -4.5 <sup>e,1</sup>                 | -6.4 <sup>1</sup>                   |
| 3ptb_pme <sup>a</sup>   | 1.7            | beta trypsin                                 | p-methyl-benzamidine                 | 135.2       | 6                    | -4.4 <sup>e,1</sup>                 | -6.6 <sup>1</sup>                   |
| 3ptb_pam <sup>a</sup>   | 1.7            | beta trypsin                                 | p-amino-benzamidine                  | 136.2       | 7                    | -6.4 <sup>e,1</sup>                 | -7.0 <sup>1</sup>                   |
| 3ptb_pmo <sup>a</sup>   | 1.7            | beta trypsin                                 | p-methoxy-benzamidine                | 151.2       | 7                    | -3.7 <sup>e,1</sup>                 | -6.0 <sup>1</sup>                   |
| 3ptb_pad <sup>a,g</sup> | 1.7            | beta trypsin                                 | p-amidino-benzamidine                | 164.2       | 10                   | -2.9 <sup>e,1</sup>                 | -5.7 <sup>1</sup>                   |
| 1dpp <sup>g</sup>       | 3.2            | dipeptide bonding protein                    | GL                                   | 188.2       | 7                    | -10.41 <sup>2</sup>                 | -8.08 <sup>2</sup>                  |
| 1k1l                    | 2.5            | bovine trypsin                               | NAP-piperazine                       | 467.6       | 15                   | -7.9 <sup>3</sup>                   | -9.8 <sup>3</sup>                   |
| 1k1i                    | 2.2            | bovine trypsin                               | NAP-D-pipecolinic acid               | 508.6       | 15                   | -10.9 <sup>3</sup>                  | -8.7 <sup>3</sup>                   |
| 1k1m                    | 2.2            | bovine trypsin                               | NAP-4-acetyl-piperazine              | 508.6       | 16                   | -8.2 <sup>3</sup>                   | -10.2 <sup>3</sup>                  |
| 1k1j                    | 2.2            | bovine trypsin                               | NAP-isopipecolinic acid methyl ester | 523.6       | 16                   | -9.5 <sup>3</sup>                   | -10.4 <sup>3</sup>                  |
| 1tp5 <sup>h</sup>       | 1.54           | PSD-95 PDZ3 domain                           | KKETWV                               | 790.9       | 33                   | -3.5 <sup>4</sup>                   | -7.6 <sup>4</sup>                   |
| 1hcs                    | NMR            | human pp60c-src SH2 domain                   | Ac-pY-EEIE-NH <sub>2</sub>           | 797.7       | 34                   | -6.8 <sup>5</sup>                   | -10.1 <sup>5</sup>                  |
| 1e4x <sup>h</sup>       | 1.9            | anti-Tgf alpha antibody fab fragment         | VVSHFND                              | 815.9       | 27                   | -24.8 <sup>b,6</sup>                | -10.3 <sup>6</sup>                  |
| 1jyr                    | 1.55           | Grb2 SH2 domain                              | Ac-S-pY-VNVQ-NH <sub>2</sub>         | 827.8       | 26                   | -7.94 <sup>7</sup>                  | -9.12 <sup>7</sup>                  |
| 1py1                    | 2.6            | ADP-ribosylation factor binding GGA1 protein | ADDI-pS-LLK                          | 951.1       | 33                   | -10.9 <sup>e,8</sup>                | -6.1 <sup>e,8</sup>                 |
| 1bbz <sup>h</sup>       | 1.65           | Abl tyrosine kinase SH3 domain               | Ac-APSYSPPPPP-NH <sub>2</sub>        | 1050.2      | 20                   | -21.9 <sup>b,9</sup>                | -7.7 <sup>9</sup>                   |
| 1abo <sup>h</sup>       | 2              | Abl tyrosine kinase SH3 domain               | Ac-APTMPPLPP-NH <sub>2</sub>         | 1058.3      | 31                   | -16.7 <sup>b,9</sup>                | -6.1 <sup>9</sup>                   |
| 2e7l                    | 2.5            | cytotoxic T cell receptor                    | QLSPFPFDL                            | 1062.2      | 30                   | -13.8 <sup>10</sup>                 | -9.0 <sup>10</sup>                  |
| 2oi9 <sup>h</sup>       | 2.35           | cytotoxic T cell receptor                    | QLSPFPFDL                            | 1062.2      | 33                   | -4.2 <sup>10</sup>                  | -7.6 <sup>10</sup>                  |
| 3e3q                    | 2.95           | cytotoxic T cell receptor                    | QLSPFPFDL                            | 1062.2      | 32                   | -12.3 <sup>10</sup>                 | -8.7 <sup>10</sup>                  |
| 2x6m                    | 1.62           | camelid antibody                             | GYQDYPEA                             | 1068.1      | 21                   | -12.44 <sup>11</sup>                | -9.16 <sup>11</sup>                 |
| 4j9g <sup>h</sup>       | 1.8            | Abl tyrosine kinase SH3 domain               | Ac-APTYP PPPPP-NH <sub>2</sub>       | 1074.2      | 27                   | -18.3 <sup>b,9</sup>                | -7.6 <sup>9</sup>                   |
| 4j9i <sup>h</sup>       | 2.2            | Abl tyrosine kinase SH3 domain               | Ac-APTYSPLPP-NH <sub>2</sub>         | 1080.2      | 31                   | -17.5 <sup>b,9</sup>                | -6.9 <sup>9</sup>                   |
| 1rlq                    | NMR            | C-src tyrosine kinase SH3 domain             | RALPPLPRY                            | 1084.3      | 27                   | -10.2 <sup>12</sup>                 | -6.4 <sup>12</sup>                  |
| 4j9f <sup>h</sup>       | 1.09           | Abl tyrosine kinase SH3 domain               | Ac-APTYPPLPP-NH <sub>2</sub>         | 1090.3      | 32                   | -17.0 <sup>b,9</sup>                | -6.9 <sup>9</sup>                   |
| 1sem <sup>g</sup>       | 2.2            | SEM-5                                        | Ace-PPPVPRRR-NH <sub>2</sub>         | 1115.4      | 27                   | -4.9 <sup>13</sup>                  | -4.7 <sup>13</sup>                  |
| 2ke1                    | NMR            | autoimmun regulator                          | ARTKQTARKS                           | 1150.3      | 27                   | -9.2 <sup>d,14</sup>                | -7.0 <sup>d,14</sup>                |
| 1mw4                    | NMR            | Grb7 SH2 domain                              | PQPE-pY-VNQP                         | 1262.2      | 33                   | -4.66 <sup>15</sup>                 | -7.70 <sup>15</sup>                 |
| 2gsi <sup>g</sup>       | 2.81           | monoclonal antibody 260.33.12                | TKHPKKGVEKY                          | 1317.6      | 33                   | -7.7 <sup>b,16</sup>                | -8.9 <sup>16</sup>                  |
| 2qbx <sup>g</sup>       | 2.3            | Ephrine B receptor 4                         | SNEWIQRLPQH                          | 1504.7      | 43                   | -9.8 <sup>17</sup>                  | -7.1 <sup>17</sup>                  |
| 1lcj                    | 1.8            | P56-lck tyrosine kinase SH2 domain           | Ac-EPQ-pY-EEIPIYL-NH <sub>2</sub>    | 1509.5      | 36                   | -9.3 <sup>18</sup>                  | -9.6 <sup>18</sup>                  |
| 2bba                    | 1.65           | Ephrine B receptor 4                         | NYLFSPNGPIARAW                       | 1606.8      | 27                   | -15.5 <sup>19</sup>                 | -9.8 <sup>19</sup>                  |

| System (PDB)      | Resolution [Å] | Target                                                                | Ligand                      | MW (ligand) | #Waters <sup>f</sup> | $\Delta H_b(\text{exp})$ [kcal/mol] | $\Delta G_b(\text{exp})$ [kcal/mol] |
|-------------------|----------------|-----------------------------------------------------------------------|-----------------------------|-------------|----------------------|-------------------------------------|-------------------------------------|
| 3ask              | 2.90           | Ubiquitin-like containing plant homeodomain and RING finger domains 1 | ARTKQTAR-Kme3-STGGKA        | 1607.9      | 53                   | -12.1 <sup>20</sup>                 | -8.6 <sup>20</sup>                  |
| 3ql9              | 0.93           | Transcriptional regulator ATRX                                        | ARTKQTAR-Kme3-STGGKA        | 1607.9      | 45                   | -12.22 <sup>21</sup>                | -8.60 <sup>21</sup>                 |
| 2v8c <sup>b</sup> | 1.98           | mouse profilin 2A                                                     | GPPPPPGPPPPGPPPPGL          | 1816.1      | 70                   | -12.4 <sup>c,22</sup>               | -6.4 <sup>c,22</sup>                |
| 2v8f <sup>b</sup> | 1.1            | mouse profilin 2A                                                     | IPPPPLPGVASIPPPPLPG         | 2007.4      | 60                   | -13.2 <sup>c,22</sup>               | -6.6 <sup>c,22</sup>                |
| 1jgn              | NMR            | poli(A)-binding protein PABC domain                                   | VVKSNLNPNAKEFVPGVKYGNL      | 2389.8      | 48                   | -14.8 <sup>23</sup>                 | -8.81 <sup>23</sup>                 |
| 1jh4              | NMR            | poli(A)-binding protein PABC domain                                   | VLMSKLSVNAPEFYPSGYSSSY      | 2426.7      | 71                   | -11.5 <sup>23</sup>                 | -7.9 <sup>23</sup>                  |
| 1axc <sup>b</sup> | 2.6            | PCNA antibody                                                         | GRKRRQTSMTDFYHSKRRLLFS      | 2777.2      | 68                   | -29.1 <sup>c,24</sup>               | -9.8 <sup>c,24</sup>                |
| 2rod              | NMR            | myeloid leukemia differentiation protein                              | AELPPEFAAQLRKIGDKVYCTWSAPD  | 2905.3      | 75                   | -20.7 <sup>25</sup>                 | -10.10 <sup>25</sup>                |
| 2jm6 <sup>b</sup> | NMR            | myeloid leukemia differentiation protein                              | PADLKDECAQLRRIGDKVNLKLLN    | 3009.5      | 65                   | -32.6 <sup>25</sup>                 | -9.41 <sup>25</sup>                 |
| 2roc <sup>e</sup> | NMR            | myeloid leukemia differentiation protein                              | EEWAREIGAQLRRIADDLNAQYERR   | 3186.4      | 65                   | -14.3 <sup>25</sup>                 | -12.50 <sup>25</sup>                |
| 2nl9 <sup>e</sup> | 1.55           | myeloid leukemia differentiation protein                              | DMRPEIWI AQELRRIGDEFNAYYARR | 3269.7      | 55                   | -19.2 <sup>25</sup>                 | -11.84 <sup>25</sup>                |

<sup>a</sup>Systems were built with computational modeling from parent system 3ptb modifying benzamidine ligand<sup>26</sup>

<sup>b</sup>Enthalpies corrected for protonation effects with buffer.

<sup>c</sup>Measurement at 303.15 K. Default is 298.15 K.

<sup>d</sup>Measurement at 296.15 K. Default is 298.15 K.

<sup>e</sup>Enthalpies converted from 298.25 K using heat capacities.

<sup>f</sup>Number of calculated interfacial water molecules.

<sup>g</sup>System not included in the tailored set ( $\Delta G_b$  model **Fig. 4a**)

<sup>h</sup>System not included in the tailored set. ( $\Delta H_b$  model **Fig. 3a**)

**Table S2 Charges of fragmented complexes and their target-ligand constituents separately**

| System   | Target | Ligand | Complex |
|----------|--------|--------|---------|
| 1abo     | -3     | 0      | -3      |
| 1axc     | -8     | 6      | -2      |
| 1bbz     | -2     | 0      | -2      |
| 1dpp     | -1     | 0      | -1      |
| 1e4x     | -2     | -1     | -3      |
| 1hcs     | 3      | -5     | -2      |
| 1jgn     | -1     | 2      | 1       |
| 1jh4     | -2     | 0      | -2      |
| 1jyr     | 1      | -2     | -1      |
| 1kli     | -1     | 0      | -1      |
| 1klj     | 1      | 1      | 2       |
| 1kl1     | 0      | 2      | 2       |
| 1klm     | 1      | 1      | 2       |
| 1lcj     | 3      | -5     | -2      |
| 1mw4     | 1      | -4     | -3      |
| 1py1     | 4      | -3     | 1       |
| 1rlq     | -3     | 2      | -1      |
| 1sem     | -3     | 3      | 0       |
| 1tp5     | 0      | 1      | 1       |
| 2bba     | 2      | 1      | 3       |
| 2e7l     | 3      | -1     | 2       |
| 2gsi     | 0      | 3      | 3       |
| 2jm6     | -1     | 2      | 1       |
| 2ke1     | -5     | 4      | -1      |
| 2n19     | 3      | 0      | 3       |
| 2oi9     | 2      | -1     | 1       |
| 2qbx     | -1     | 0      | -1      |
| 2roc     | 1      | -2     | -1      |
| 2rod     | 1      | -1     | 0       |
| 2v8c     | -1     | 0      | -1      |
| 2v8f     | 1      | 0      | 1       |
| 2x6m     | 2      | -3     | -1      |
| 3ask     | -10    | 5      | -5      |
| 3e3q     | 2      | -1     | 1       |
| 3ptb     | 0      | 1      | 1       |
| 3ptb_pad | -1     | 1      | 0       |
| 3ptb_pam | 0      | 1      | 1       |
| 3ptb_pme | -1     | 1      | 0       |
| 3ptb_pmo | 0      | 1      | 1       |
| 3q19     | -8     | 5      | -3      |
| 4j9f     | -3     | 0      | -3      |
| 4j9g     | -3     | 0      | -3      |
| 4j9i     | -3     | 0      | -3      |

**Table S3 Correlation matrix ( $R^2$  values) for shortlisted descriptors<sup>a</sup>, both their parent and daughter (NA normalized) versions.  $\Delta G_b$  and  $\Delta_rH$  values are also included for comparison.**

|                      | NHA <sup>b</sup> /NA | NHB <sup>c</sup> /NB | MW <sup>d</sup> /NA | NHA <sup>b</sup> | NHB  | MW <sup>c</sup> | $\Delta G_b$ | $\Delta_rH$ |
|----------------------|----------------------|----------------------|---------------------|------------------|------|-----------------|--------------|-------------|
| NHA <sup>b</sup> /NA | 1.00                 | 0.93                 | 0.91                | 0.03             | 0.03 | 0.03            | 0.14         | 0.01        |
| NHB <sup>c</sup> /NB | 0.93                 | 1.00                 | 0.82                | 0.02             | 0.02 | 0.02            | 0.10         | 0.02        |
| MW <sup>d</sup> /NA  | 0.91                 | 0.82                 | 1.00                | 0.01             | 0.00 | 0.00            | 0.21         | 0.00        |
| NHA <sup>b</sup>     | 0.03                 | 0.02                 | 0.01                | 1.00             | 1.00 | 1.00            | 0.21         | 0.51        |
| NHB                  | 0.03                 | 0.02                 | 0.00                | 1.00             | 1.00 | 1.00            | 0.20         | 0.49        |
| MW <sup>c</sup>      | 0.03                 | 0.02                 | 0.00                | 1.00             | 1.00 | 1.00            | 0.21         | 0.51        |
| $\Delta G_b$         | 0.14                 | 0.10                 | 0.21                | 0.21             | 0.20 | 0.21            | 1.00         | 0.23        |
| $\Delta_rH$          | 0.01                 | 0.02                 | 0.00                | 0.51             | 0.49 | 0.51            | 0.23         | 1.00        |

<sup>a</sup>Descriptors are detailed in Yap et al (2011)<sup>27</sup>.

<sup>b</sup>NHA stands for number of heavy atoms.

<sup>c</sup>NHB stands for number bonds between heavy atoms.

<sup>d</sup>MW stands for molecular weight.

**Table S4 Regression parameters and residuals for the different binding enthalpy models assuming  $\beta=0$  (N=31, tailored set)**

| System                           | Vacuum     | Explicit | Implicit | Hybrid 1 | Hybrid 2 | Hybrid 3 |
|----------------------------------|------------|----------|----------|----------|----------|----------|
|                                  | $\epsilon$ |          |          |          |          |          |
| ldpp                             | -7.17      | -7.26    | -0.82    | -4.51    | -4.89    | -5.69    |
| lhcs                             | 3.06       | 6.15     | -6.43    | 1.32     | 1.63     | 2.68     |
| ljgn                             | -9.90      | -5.18    | -10.56   | -2.51    | -2.77    | -3.18    |
| ljh4                             | -6.77      | -0.46    | -3.82    | 0.05     | 0.69     | 1.97     |
| ljyr                             | -2.06      | -0.77    | 0.26     | 2.13     | 1.14     | 1.03     |
| lkli                             | -8.59      | -7.19    | -1.57    | -3.30    | -2.44    | -2.98    |
| lk1j                             | -7.44      | -6.48    | 1.00     | -3.24    | -2.63    | -2.97    |
| lk1l                             | -5.66      | -4.39    | 2.26     | -1.63    | -0.61    | -1.09    |
| lk1m                             | -6.31      | -5.30    | 0.38     | -3.03    | -2.58    | -2.48    |
| llcj                             | 3.05       | 3.71     | 2.63     | 3.07     | 1.65     | 1.78     |
| lmw4                             | 0.69       | 4.32     | -7.22    | 1.23     | 1.40     | 1.65     |
| lpyl                             | -1.63      | -0.50    | -2.63    | -2.40    | -2.52    | -2.92    |
| lrlq                             | -6.37      | -4.29    | -4.44    | -5.18    | -2.65    | -2.45    |
| lsem                             | 0.02       | 1.48     | 2.72     | 2.34     | 2.78     | 2.61     |
| 2bba                             | -10.17     | -7.97    | -5.13    | -4.81    | -4.24    | -4.97    |
| 2e7l                             | -7.33      | -4.25    | -1.34    | 0.30     | 2.45     | 0.90     |
| 2gsi                             | -1.94      | 0.43     | 3.29     | 1.40     | 1.13     | 1.35     |
| 2ke1                             | 3.93       | 3.32     | 1.32     | 2.19     | 2.14     | 0.75     |
| 2nl9                             | -23.03     | -9.05    | -1.05    | -1.09    | -2.83    | -3.18    |
| 2qbx                             | -5.22      | -0.85    | 5.58     | 6.32     | 5.62     | 5.72     |
| 2roc                             | -11.43     | -5.40    | -6.23    | -3.68    | -3.77    | -2.06    |
| 2rod                             | -14.98     | -7.59    | -9.02    | -1.53    | -2.63    | -1.66    |
| 2x6m                             | -4.77      | -4.69    | -4.25    | -3.45    | -5.89    | -6.24    |
| 3ask                             | 10.20      | 10.20    | -1.16    | 0.45     | 0.21     | 1.75     |
| 3e3q                             | -5.20      | -2.07    | 5.10     | 4.73     | 5.06     | 4.23     |
| 3ptb                             | -2.74      | -2.33    | 2.13     | -0.81    | 0.21     | -0.07    |
| 3ptb_pad                         | -0.36      | 0.20     | 4.88     | 1.92     | 3.34     | 2.88     |
| 3ptb_pam                         | -4.63      | -4.21    | 0.03     | -2.33    | -0.92    | -1.75    |
| 3ptb_pme                         | -2.10      | -2.18    | 2.91     | -0.66    | -0.09    | -0.56    |
| 3ptb_pmo                         | -1.76      | -1.57    | 3.59     | 0.28     | 1.40     | 0.69     |
| 3ql9                             | 6.71       | 8.26     | 0.39     | 1.80     | 1.71     | 2.34     |
| <b>R<sup>2</sup></b>             | 0.51       | 0.78     | 0.85     | 0.93     | 0.90     | 0.93     |
| <b>R<sup>2</sup>(cv)</b>         | 0.43       | 0.73     | 0.82     | 0.92     | 0.89     | 0.92     |
| <b>RMSE</b>                      | 7.59       | 5.09     | 4.24     | 2.84     | 2.84     | 2.91     |
| <b><math>\alpha</math></b>       | 1.38E-02   | 9.50E-03 | 1.31E-01 | 6.50E-02 | 4.81E-02 | 4.10E-02 |
| <b><math>\Delta\alpha</math></b> | 2.47E-03   | 9.24E-04 | 1.02E-02 | 3.23E-03 | 2.38E-03 | 2.09E-03 |
| <b><math>t_\alpha</math></b>     | 5.58E+00   | 1.03E+01 | 1.29E+01 | 2.02E+01 | 2.02E+01 | 1.97E+01 |
| <b><math>p_\alpha</math></b>     | 4.59E-06   | 2.36E-11 | 9.59E-14 | 5.41E-19 | 5.21E-19 | 1.08E-18 |



**Table S5 The construction of the tailored set of the  $\Delta H_b$  model**

A systematic exclusion of data points was performed on the full set of points to avoid a bias of the least squares fit algorithm by possible outliers. The outliers were excluded one-by-one, and in each step a simple linear regression ( $\beta \neq 0$ ) was calculated according to **Eq. 2** and the data point with the largest residual was considered as an outlier and excluded in the next round.

| $N_o^a$        | System <sup>b</sup> | $R^2$ | RMSE | $\beta$   | $\Delta\beta$ | $t(\beta)$ | $p(\beta)$ | $\alpha_1$ | $\Delta\alpha_1$ | $t(\alpha_1)$ | $p(\alpha_1)$ |
|----------------|---------------------|-------|------|-----------|---------------|------------|------------|------------|------------------|---------------|---------------|
| <b>Hybrid1</b> |                     |       |      |           |               |            |            |            |                  |               |               |
| 0              | -                   | 0.24  | 5.81 | -5.55E+00 | 2.03E+00      | -2.73E+00  | 9.18E-03   | 4.47E-02   | 1.24E-02         | 3.61E+00      | 8.21E-04      |
| 1              | 1bbz                | 0.32  | 5.43 | -4.24E+00 | 1.96E+00      | -2.17E+00  | 3.62E-02   | 5.12E-02   | 1.18E-02         | 4.33E+00      | 9.70E-05      |
| 2              | 1e4x                | 0.36  | 5.08 | -3.86E+00 | 1.84E+00      | -2.10E+00  | 4.24E-02   | 5.16E-02   | 1.11E-02         | 4.66E+00      | 3.59E-05      |
| 3              | 2jm6                | 0.28  | 4.64 | -5.06E+00 | 1.73E+00      | -2.93E+00  | 5.75E-03   | 4.11E-02   | 1.07E-02         | 3.83E+00      | 4.70E-04      |
| 4              | 1axc                | 0.16  | 4.29 | -6.48E+00 | 1.69E+00      | -3.84E+00  | 4.62E-04   | 2.90E-02   | 1.09E-02         | 2.66E+00      | 1.15E-02      |
| 5              | 4j9g                | 0.21  | 4.07 | -5.78E+00 | 1.63E+00      | -3.55E+00  | 1.09E-03   | 3.22E-02   | 1.04E-02         | 3.09E+00      | 3.85E-03      |
| 6              | 2oi9                | 0.29  | 3.80 | -5.18E+00 | 1.54E+00      | -3.36E+00  | 1.89E-03   | 3.83E-02   | 1.01E-02         | 3.81E+00      | 5.41E-04      |
| 7              | 4j9i                | 0.35  | 3.57 | -4.61E+00 | 1.47E+00      | -3.14E+00  | 3.51E-03   | 4.07E-02   | 9.51E-03         | 4.28E+00      | 1.45E-04      |
| 8              | 1abo                | 0.43  | 3.29 | -3.85E+00 | 1.39E+00      | -2.78E+00  | 8.86E-03   | 4.43E-02   | 8.88E-03         | 4.99E+00      | 1.91E-05      |
| 9              | 4j9f                | 0.51  | 2.98 | -3.24E+00 | 1.27E+00      | -2.55E+00  | 1.58E-02   | 4.68E-02   | 8.08E-03         | 5.79E+00      | 2.01E-06      |
| 10             | 1tp5                | 0.55  | 2.80 | -3.44E+00 | 1.20E+00      | -2.86E+00  | 7.43E-03   | 4.67E-02   | 7.62E-03         | 6.13E+00      | 8.37E-07      |
| 11             | 2v8f                | 0.60  | 2.66 | -2.96E+00 | 1.17E+00      | -2.53E+00  | 1.68E-02   | 4.89E-02   | 7.32E-03         | 6.68E+00      | 2.10E-07      |
| 12             | 2v8c                | 0.62  | 2.61 | -2.70E+00 | 1.16E+00      | -2.33E+00  | 2.70E-02   | 4.98E-02   | 7.20E-03         | 6.91E+00      | 1.35E-07      |
| <b>Hybrid3</b> |                     |       |      |           |               |            |            |            |                  |               |               |
| 0              | -                   | 0.27  | 5.72 | -4.77E+00 | 2.10E+00      | -2.28E+00  | 2.80E-02   | 3.11E-02   | 8.04E-03         | 3.86E+00      | 3.91E-04      |
| 1              | 2jm6                | 0.21  | 5.28 | -5.78E+00 | 1.97E+00      | -2.93E+00  | 5.56E-03   | 2.52E-02   | 7.72E-03         | 3.27E+00      | 2.24E-03      |
| 2              | 1e4x                | 0.25  | 4.89 | -5.33E+00 | 1.83E+00      | -2.90E+00  | 6.04E-03   | 2.57E-02   | 7.16E-03         | 3.60E+00      | 8.97E-04      |
| 3              | 1bbz                | 0.35  | 4.42 | -4.12E+00 | 1.70E+00      | -2.42E+00  | 2.03E-02   | 2.94E-02   | 6.57E-03         | 4.48E+00      | 6.73E-05      |
| 4              | 2oi9                | 0.42  | 4.13 | -3.72E+00 | 1.60E+00      | -2.33E+00  | 2.54E-02   | 3.23E-02   | 6.25E-03         | 5.17E+00      | 8.41E-06      |
| 5              | 4j9g                | 0.48  | 3.88 | -3.12E+00 | 1.52E+00      | -2.05E+00  | 4.81E-02   | 3.38E-02   | 5.91E-03         | 5.72E+00      | 1.67E-06      |
| 6              | 4j9i                | 0.52  | 3.67 | -2.64E+00 | 1.46E+00      | -1.81E+00  | 7.93E-02   | 3.49E-02   | 5.62E-03         | 6.20E+00      | 4.17E-07      |
| 7              | 4j9f                | 0.57  | 3.47 | -2.19E+00 | 1.39E+00      | -1.57E+00  | 1.26E-01   | 3.59E-02   | 5.33E-03         | 6.73E+00      | 9.96E-08      |
| 8              | 1abo                | 0.62  | 3.23 | -1.70E+00 | 1.31E+00      | -1.29E+00  | 2.06E-01   | 3.69E-02   | 4.98E-03         | 7.41E+00      | 1.63E-08      |
| 9              | 1axc                | 0.49  | 3.04 | -3.00E+00 | 1.36E+00      | -2.21E+00  | 3.46E-02   | 3.04E-02   | 5.47E-03         | 5.56E+00      | 3.86E-06      |
| 10             | 1tp5                | 0.51  | 2.93 | -3.29E+00 | 1.32E+00      | -2.49E+00  | 1.82E-02   | 2.99E-02   | 5.29E-03         | 5.65E+00      | 3.36E-06      |
| 11             | 2v8f                | 0.54  | 2.84 | -2.93E+00 | 1.30E+00      | -2.25E+00  | 3.20E-02   | 3.08E-02   | 5.17E-03         | 5.96E+00      | 1.56E-06      |
| 12             | 2v8c                | 0.58  | 2.74 | -2.46E+00 | 1.28E+00      | -1.91E+00  | 6.57E-02   | 3.21E-02   | 5.05E-03         | 6.37E+00      | 5.83E-07      |

<sup>a</sup>Number of points left out from full set.

<sup>b</sup>The system that was left out in the actual step.

**Table S6 Measurement methods of protein concentration for ITC experiments**

| <b>PDB code</b>                                                                                                                                                                              | <b>Measurement method</b>                                                                    | <b>References</b>                                                                                                                                                                                                                                                                                                                                                                                                                                                                                                                                          |
|----------------------------------------------------------------------------------------------------------------------------------------------------------------------------------------------|----------------------------------------------------------------------------------------------|------------------------------------------------------------------------------------------------------------------------------------------------------------------------------------------------------------------------------------------------------------------------------------------------------------------------------------------------------------------------------------------------------------------------------------------------------------------------------------------------------------------------------------------------------------|
| 3ptb; 3ptb_pme; 3ptb_pam;<br>3ptb_pmo; 3ptb_pad; 1dpp;<br>1hcs; 1tp5; 1e4x; 1bbz; labo;<br>1jyr; 4j9f; 4j9g; 4j9i; 2x6m;<br>2ke1; 1mw4; 3ask; 2qbx;<br>2bba; 3ql9; 2rod; 2jm6; 2nl9;<br>2roc | UV spectrophotometry with<br>calculated or previously<br>measured extinction<br>coefficient. | Talhout et al. (2001) <sup>1</sup> ; Payne et al.<br>(2000) <sup>2</sup> ; Charifson et al. (1997) <sup>5</sup> ;<br>Kaufmann et al. (2011) <sup>4</sup> ; Hahn et<br>al. (2001) <sup>6</sup> ; Palencia et al.<br>(2004) <sup>9</sup> ; McNemar et al. (1997) <sup>7</sup> ;<br>De Genst et al. (2010) <sup>11</sup> ; Org et<br>al. (2008) <sup>14</sup> ; Ivancic et al.<br>(2005) <sup>15</sup> ; Arita et al. (2012) <sup>20</sup> ;<br>Chrencik et al. (2006) <sup>19</sup> ; Iwase et<br>al. (2011) <sup>21</sup> ; Day et al. (2008) <sup>25</sup> |
| 1rlq                                                                                                                                                                                         | Fitted from ligand<br>concentration and known<br>complex stoichiometry.                      | Wang et al. (2001) <sup>12</sup>                                                                                                                                                                                                                                                                                                                                                                                                                                                                                                                           |
| 1k1i; 1k1j; 1k1l; 1k1m; 1py1;<br>2e7l; 3e3q; 2oi9; 1sem; 2gsi;<br>1lcj; 2v8c; 2v8f; 1jgn; 1jh4;<br>1axc                                                                                      | Not specified in the article.                                                                | Dullweber et al. (2001) <sup>3</sup> ; He et al.<br>(2003) <sup>8</sup> ; Jones et al. (2008) <sup>10</sup> ;<br>Ferreon et al. (2003) <sup>13</sup> ;<br>Armstrong et al. (2013) <sup>16</sup> ; Chung<br>et al. (1998) <sup>18</sup> ; Kursula et al.<br>(2008) <sup>22</sup> ; Kozlov et al. (2004) <sup>23</sup> ;<br>Bruning et al. (2004) <sup>24</sup>                                                                                                                                                                                              |

**Table S7 Regression parameters and residuals for the different binding enthalpy models assuming  $\beta=0$  (N=43, full set)**

| System               | Vacuum     | Explicit | Implicit | Hybrid 1 | Hybrid 2 | Hybrid 3 |
|----------------------|------------|----------|----------|----------|----------|----------|
|                      | $\epsilon$ |          |          |          |          |          |
| labo                 | -15.06     | -11.44   | -11.08   | -10.52   | -9.17    | -8.20    |
| laxc                 | -8.82      | -3.60    | -3.46    | -4.74    | -2.75    | -1.60    |
| lbbz                 | -20.63     | -18.66   | -17.01   | -18.31   | -17.58   | -16.75   |
| ldpp                 | -6.36      | -6.61    | 1.00     | -3.60    | -4.03    | -4.93    |
| 1e4x                 | -23.00     | -19.26   | -16.00   | -14.14   | -14.60   | -14.65   |
| lhcs                 | 5.51       | 8.85     | -6.36    | 2.57     | 2.94     | 4.21     |
| ljgn                 | -8.68      | -3.18    | -9.76    | -0.63    | -0.89    | -1.30    |
| ljh4                 | -5.59      | 1.83     | -2.37    | 1.82     | 2.60     | 4.14     |
| ljyr                 | -0.59      | 0.72     | 1.81     | 3.67     | 2.56     | 2.48     |
| 1kli                 | -8.01      | -6.41    | 0.20     | -2.13    | -1.12    | -1.70    |
| 1klj                 | -6.93      | -5.85    | 2.99     | -2.28    | -1.56    | -1.92    |
| 1kl1                 | -5.10      | -3.66    | 4.18     | -0.67    | 0.53     | 0.01     |
| 1klm                 | -5.83      | -4.70    | 2.01     | -2.24    | -1.70    | -1.56    |
| 1lej                 | 6.12       | 6.42     | 4.89     | 4.96     | 3.36     | 3.57     |
| 1mw4                 | 2.02       | 6.19     | -7.71    | 2.14     | 2.34     | 2.67     |
| 1py1                 | 0.67       | 1.66     | -1.06    | -1.10    | -1.22    | -1.63    |
| 1rlq                 | -5.42      | -3.07    | -3.34    | -4.41    | -1.47    | -1.20    |
| 1sem                 | 1.24       | 2.81     | 4.16     | 3.45     | 3.98     | 3.82     |
| 1tp5                 | 2.92       | 5.88     | 3.77     | 7.16     | 5.88     | 5.80     |
| 2bba                 | -8.85      | -6.41    | -3.16    | -3.17    | -2.48    | -3.27    |
| 2e7l                 | -5.73      | -2.27    | 1.02     | 2.46     | 4.98     | 3.27     |
| 2gsi                 | -0.51      | 2.12     | 5.37     | 2.79     | 2.51     | 2.82     |
| 2jm6                 | -23.25     | -16.71   | -11.31   | -9.79    | -12.95   | -12.16   |
| 2ke1                 | 7.20       | 5.93     | 3.31     | 3.94     | 3.91     | 2.35     |
| 2nl9                 | -23.99     | -6.94    | 2.39     | 1.68     | -0.28    | -0.59    |
| 2oi9                 | 4.01       | 7.09     | 11.33    | 13.69    | 14.35    | 12.86    |
| 2qbx                 | -4.08      | 1.01     | 8.49     | 8.79     | 8.03     | 8.22     |
| 2roc                 | -10.72     | -3.55    | -4.71    | -2.05    | -2.13    | -0.09    |
| 2rod                 | -13.56     | -4.87    | -6.81    | 1.41     | 0.18     | 1.41     |
| 2v8c                 | -10.23     | -7.61    | -1.96    | -3.88    | -6.10    | -5.34    |
| 2v8f                 | -11.42     | -8.81    | -3.40    | -6.46    | -5.96    | -5.14    |
| 2x6m                 | -2.87      | -3.08    | -2.69    | -2.07    | -4.87    | -5.24    |
| 3ask                 | 15.73      | 14.84    | 0.91     | 2.38     | 2.12     | 3.98     |
| 3e3q                 | -3.44      | 0.05     | 8.40     | 7.34     | 7.77     | 6.89     |
| 3ptb                 | -2.30      | -1.88    | 3.38     | -0.25    | 0.95     | 0.65     |
| 3ptb_pad             | 0.27       | 0.84     | 6.35     | 2.65     | 4.31     | 3.81     |
| 3ptb_pam             | -4.19      | -3.76    | 1.25     | -1.71    | -0.07    | -1.00    |
| 3ptb_pme             | -1.53      | -1.72    | 4.29     | -0.09    | 0.58     | 0.06     |
| 3ptb_pmo             | -1.27      | -1.12    | 4.97     | 0.89     | 2.19     | 1.40     |
| 3ql9                 | 11.41      | 12.51    | 2.78     | 3.95     | 3.88     | 4.69     |
| 4j9f                 | -14.91     | -11.75   | -9.41    | -9.37    | -8.77    | -8.33    |
| 4j9g                 | -16.38     | -13.73   | -10.76   | -11.82   | -10.63   | -10.68   |
| 4j9i                 | -15.42     | -12.41   | -9.42    | -10.07   | -9.44    | -9.07    |
| <b>R<sup>2</sup></b> | 0.43       | 0.66     | 0.77     | 0.79     | 0.79     | 0.81     |

| <b>System</b>                    | <b>Vacuum</b> | <b>Explicit</b> | <b>Implicit</b> | <b>Hybrid 1</b> | <b>Hybrid 2</b> | <b>Hybrid 3</b> |
|----------------------------------|---------------|-----------------|-----------------|-----------------|-----------------|-----------------|
| <b>R<sup>2</sup>(cv)</b>         | 0.31          | 0.58            | 0.71            | 0.75            | 0.75            | 0.78            |
| <b>RMSE</b>                      | 10.44         | 8.03            | 6.70            | 6.32            | 6.30            | 6.07            |
| <b><math>\alpha</math></b>       | 1.72E-02      | 1.15E-02        | 1.56E-01        | 7.50E-02        | 5.56E-02        | 4.76E-02        |
| <b><math>\Delta\alpha</math></b> | 3.06E-03      | 1.26E-03        | 1.34E-02        | 5.95E-03        | 4.39E-03        | 3.59E-03        |
| <b><math>t_\alpha</math></b>     | 5.62E+00      | 9.08E+00        | 1.17E+01        | 1.26E+01        | 1.27E+01        | 1.33E+01        |
| <b><math>p_\alpha</math></b>     | 1.42E-06      | 1.83E-11        | 8.47E-15        | 7.44E-16        | 6.36E-16        | 1.30E-16        |

**Table S8 Regression parameters and residuals for the different binding enthalpy models assuming  $\beta \neq 0$  (N=43, full set)**

|                      | Vacuum     | Implicit | Explicit | Hybrid 1 | Hybrid 2 | Hybrid 3 |
|----------------------|------------|----------|----------|----------|----------|----------|
|                      | $\epsilon$ |          |          |          |          |          |
| labo                 | -4.90      | -5.97    | -7.34    | -7.47    | -6.82    | -6.38    |
| laxc                 | -16.17     | -11.72   | -9.30    | -9.03    | -7.76    | -6.40    |
| lbbz                 | -10.12     | -11.84   | -12.92   | -14.21   | -13.97   | -13.76   |
| ldpp                 | 1.54       | -0.16    | 1.97     | -0.80    | -1.23    | -2.06    |
| 1e4x                 | -12.99     | -13.98   | -13.78   | -12.90   | -13.29   | -13.41   |
| lhes                 | 5.65       | 7.34     | -0.15    | 4.33     | 4.43     | 5.15     |
| ljgn                 | -2.73      | -1.98    | -5.75    | -0.81    | -1.04    | -1.22    |
| ljh4                 | 0.56       | 1.88     | -0.31    | 1.99     | 2.38     | 3.47     |
| ljyr                 | 4.21       | 3.90     | 3.57     | 4.53     | 3.75     | 3.63     |
| 1kli                 | 0.98       | -0.43    | 1.31     | -0.13    | 0.35     | -0.13    |
| 1klj                 | 2.36       | 0.70     | 3.44     | 0.35     | 0.63     | 0.22     |
| 1kl1                 | 3.97       | 2.49     | 4.83     | 1.96     | 2.53     | 2.03     |
| 1klm                 | 3.64       | 1.95     | 3.55     | 0.90     | 1.05     | 0.91     |
| 1lcj                 | 3.33       | 4.86     | 4.53     | 4.75     | 3.70     | 3.87     |
| 1mw4                 | 7.45       | 7.90     | 0.17     | 4.94     | 4.90     | 4.89     |
| 1py1                 | 1.50       | 2.22     | 0.66     | 0.49     | 0.29     | -0.08    |
| 1rlq                 | 1.79       | 1.14     | -0.20    | -1.20    | 0.41     | 0.44     |
| 1sem                 | 7.17       | 6.63     | 6.25     | 5.63     | 5.80     | 5.56     |
| 1tp5                 | 8.59       | 8.58     | 6.72     | 8.40     | 7.51     | 7.34     |
| 2bba                 | -3.40      | -3.51    | -2.64    | -2.60    | -2.28    | -2.75    |
| 2e7l                 | -1.61      | -1.01    | 0.35     | 1.44     | 2.93     | 2.10     |
| 2gsi                 | 4.44       | 4.52     | 5.54     | 4.10     | 3.81     | 3.93     |
| 2jm6                 | -20.33     | -18.38   | -15.07   | -13.45   | -15.34   | -14.50   |
| 2ke1                 | 3.49       | 4.77     | 3.75     | 4.18     | 4.08     | 3.11     |
| 2nl9                 | -7.79      | -6.17    | -1.51    | -1.20    | -2.39    | -2.29    |
| 2oi9                 | 8.00       | 8.51     | 10.33    | 12.02    | 12.39    | 11.70    |
| 2qbx                 | 2.25       | 2.75     | 6.17     | 6.83     | 6.35     | 6.73     |
| 2roc                 | -2.38      | -1.77    | -2.87    | -1.45    | -1.59    | -0.26    |
| 2rod                 | -8.57      | -6.50    | -7.03    | -1.97    | -2.69    | -1.51    |
| 2v8c                 | -0.57      | -1.83    | -0.53    | -1.77    | -3.27    | -3.02    |
| 2v8f                 | -1.39      | -2.76    | -1.66    | -3.63    | -3.50    | -3.17    |
| 2x6m                 | -0.16      | -0.37    | -0.93    | -0.71    | -2.53    | -2.97    |
| 3ask                 | 1.29       | 5.75     | 1.11     | 2.08     | 1.86     | 3.16     |
| 3e3q                 | -0.06      | 0.76     | 4.93     | 4.96     | 5.21     | 4.99     |
| 3ptb                 | 7.33       | 5.36     | 6.04     | 3.58     | 4.11     | 3.63     |
| 3ptb_pad             | 8.99       | 7.33     | 8.35     | 5.96     | 6.79     | 6.25     |
| 3ptb_pam             | 5.43       | 3.46     | 4.01     | 1.94     | 2.75     | 1.90     |
| 3ptb_pme             | 7.47       | 5.47     | 6.56     | 3.72     | 3.93     | 3.28     |
| 3ptb_pmo             | 8.15       | 6.14     | 7.25     | 4.59     | 5.19     | 4.40     |
| 3ql9                 | 0.91       | 4.91     | 2.03     | 2.97     | 2.88     | 3.58     |
| 4j9f                 | -5.17      | -6.28    | -6.61    | -6.91    | -6.69    | -6.57    |
| 4j9g                 | -6.48      | -7.80    | -7.94    | -8.89    | -8.33    | -8.55    |
| 4j9i                 | -5.67      | -6.83    | -6.86    | -7.53    | -7.30    | -7.23    |
| <b>R<sup>2</sup></b> | 0.00       | 0.09     | 0.17     | 0.24     | 0.22     | 0.27     |

|                                  | <b>Vacuum</b> | <b>Implicit</b> | <b>Explicit</b> | <b>Hybrid 1</b> | <b>Hybrid 2</b> | <b>Hybrid 3</b> |
|----------------------------------|---------------|-----------------|-----------------|-----------------|-----------------|-----------------|
| <b>R<sup>2</sup>(cv)</b>         | 0.00          | 0.03            | 0.09            | 0.16            | 0.14            | 0.19            |
| <b>RMSE</b>                      | 6.66          | 6.36            | 6.08            | 5.81            | 5.90            | 5.72            |
| <b><math>\alpha</math></b>       | 1.04E-03      | 3.78E-03        | 8.16E-02        | 4.47E-02        | 3.38E-02        | 3.11E-02        |
| <b><math>\Delta\alpha</math></b> | 2.88E-03      | 1.87E-03        | 2.82E-02        | 1.24E-02        | 9.95E-03        | 8.04E-03        |
| <b><math>t_\alpha</math></b>     | 3.62E-01      | 2.02E+00        | 2.89E+00        | 3.61E+00        | 3.40E+00        | 3.86E+00        |
| <b><math>p_\alpha</math></b>     | 7.19E-01      | 4.96E-02        | 6.05E-03        | 8.21E-04        | 1.52E-03        | 3.91E-04        |
| <b><math>\beta</math></b>        | -1.17E+01     | -8.99E+00       | -6.42E+00       | -5.55E+00       | -5.30E+00       | -4.77E+00       |
| <b><math>\Delta\beta</math></b>  | 1.51E+00      | 1.83E+00        | 2.18E+00        | 2.03E+00        | 2.20E+00        | 2.10E+00        |
| <b><math>t_\beta</math></b>      | -7.73E+00     | -4.92E+00       | -2.95E+00       | -2.73E+00       | -2.41E+00       | -2.28E+00       |
| <b><math>p_\beta</math></b>      | 1.59E-09      | 1.45E-05        | 5.25E-03        | 9.18E-03        | 2.07E-02        | 2.80E-02        |

**Table S9 Regression parameters and residuals for the different binding enthalpy models assuming  $\beta \neq 0$  (N=31, tailored set)**

| System                           | Vacuum    | Implicit  | Explicit  | Hybrid 1  | Hybrid 2  | Hybrid 3  |
|----------------------------------|-----------|-----------|-----------|-----------|-----------|-----------|
| $\epsilon$                       |           |           |           |           |           |           |
| 1dpp                             | -0.64     | -2.48     | -0.18     | -3.19     | -3.86     | -4.25     |
| 1hcs                             | 3.50      | 5.11      | -1.39     | 2.12      | 2.14      | 3.09      |
| 1jgn                             | -4.90     | -4.24     | -7.37     | -2.70     | -2.90     | -3.23     |
| 1jh4                             | -1.61     | -0.37     | -2.27     | 0.04      | 0.53      | 1.51      |
| 1jyr                             | 2.04      | 1.63      | 1.56      | 2.46      | 1.54      | 1.55      |
| 1kli                             | -1.21     | -2.74     | -0.81     | -2.38     | -1.94     | -2.24     |
| 1klj                             | 0.17      | -1.62     | 1.21      | -2.01     | -1.84     | -1.93     |
| 1kl1                             | 1.79      | 0.18      | 2.63      | -0.40     | 0.11      | -0.11     |
| 1klm                             | 1.46      | -0.37     | 1.50      | -1.54     | -1.57     | -1.26     |
| 1lej                             | 1.20      | 2.64      | 2.15      | 2.87      | 1.71      | 1.84      |
| 1mw4                             | 5.28      | 5.64      | -0.78     | 2.55      | 2.33      | 2.74      |
| 1py1                             | -0.65     | -0.02     | -1.36     | -1.69     | -2.00     | -2.19     |
| 1rlq                             | -0.39     | -1.15     | -1.97     | -3.66     | -1.98     | -1.67     |
| 1sem                             | 5.00      | 4.35      | 4.30      | 3.34      | 3.43      | 3.44      |
| 2bba                             | -5.57     | -5.79     | -4.86     | -4.62     | -4.23     | -4.79     |
| 2e71                             | -3.77     | -3.27     | -2.07     | -0.31     | 1.57      | 0.18      |
| 2gsi                             | 2.27      | 2.25      | 3.26      | 1.96      | 1.57      | 1.85      |
| 2ke1                             | 1.36      | 2.54      | 1.52      | 2.22      | 2.13      | 1.05      |
| 2nl9                             | -10.00    | -8.43     | -4.49     | -2.64     | -3.74     | -4.18     |
| 2qbx                             | 0.07      | 0.49      | 3.46      | 5.24      | 4.89      | 4.82      |
| 2roc                             | -4.56     | -4.03     | -4.87     | -3.47     | -3.63     | -2.25     |
| 2rod                             | -10.73    | -8.73     | -9.38     | -3.33     | -3.84     | -3.32     |
| 2x6m                             | -2.32     | -2.64     | -2.94     | -2.86     | -5.04     | -5.12     |
| 3ask                             | -0.80     | 3.60      | -1.16     | 0.21      | 0.03      | 1.21      |
| 3e3q                             | -2.22     | -1.49     | 2.01      | 3.44      | 3.98      | 3.11      |
| 3ptb                             | 5.15      | 3.04      | 4.18      | 1.02      | 1.39      | 1.43      |
| 3ptb_pad                         | 6.81      | 5.01      | 6.38      | 3.49      | 4.24      | 4.09      |
| 3ptb_pam                         | 3.25      | 1.15      | 2.18      | -0.59     | 0.11      | -0.30     |
| 3ptb_pme                         | 5.29      | 3.16      | 4.64      | 1.16      | 1.16      | 1.07      |
| 3ptb_pmo                         | 5.96      | 3.82      | 5.33      | 2.05      | 2.50      | 2.20      |
| 3ql9                             | -1.19     | 2.74      | -0.41     | 1.21      | 1.24      | 1.65      |
| <b>R<sup>2</sup></b>             | 0.01      | 0.23      | 0.25      | 0.62      | 0.58      | 0.58      |
| <b>R<sup>2</sup>(cv)</b>         | 0.00      | 0.17      | 0.18      | 0.55      | 0.53      | 0.53      |
| <b>RMSE</b>                      | 4.22      | 3.73      | 3.66      | 2.61      | 2.73      | 2.74      |
| <b><math>\alpha</math></b>       | 1.11E-03  | 3.86E-03  | 6.87E-02  | 4.98E-02  | 3.95E-02  | 3.21E-02  |
| <b><math>\Delta\alpha</math></b> | 2.11E-03  | 1.32E-03  | 2.19E-02  | 7.20E-03  | 6.18E-03  | 5.05E-03  |
| <b><math>t_\alpha</math></b>     | 5.26E-01  | 2.91E+00  | 3.14E+00  | 6.91E+00  | 6.39E+00  | 6.37E+00  |
| <b><math>p_\alpha</math></b>     | 6.03E-01  | 6.80E-03  | 3.84E-03  | 1.35E-07  | 5.48E-07  | 5.83E-07  |
| <b><math>\beta</math></b>        | -9.51E+00 | -6.66E+00 | -5.22E+00 | -2.70E+00 | -2.01E+00 | -2.46E+00 |
| <b><math>\Delta\beta</math></b>  | 1.18E+00  | 1.33E+00  | 1.66E+00  | 1.16E+00  | 1.34E+00  | 1.28E+00  |
| <b><math>t_\beta</math></b>      | -8.05E+00 | -5.00E+00 | -3.15E+00 | -2.33E+00 | -1.50E+00 | -1.91E+00 |
| <b><math>p_\beta</math></b>      | 7.09E-09  | 2.53E-05  | 3.80E-03  | 2.70E-02  | 1.45E-01  | 6.57E-02  |

**Table S10 Comparison of the statistical parameters obtained by 1SCF vs. QM-minimization (model Hybrid 3,  $\beta \neq 0$ ).** The comparison of the results based on  $\Delta_r H$  values from 1SCF and QM minimization shows no improvement for the QM-minimized models over the 1SCF ones neither for the full set (**Row 0**), nor for the final, tailored set (**Row 12**).

| $N_o^a$   | 1SCF                |                |             | Minimization |                |             |
|-----------|---------------------|----------------|-------------|--------------|----------------|-------------|
|           | System <sup>b</sup> | R <sup>2</sup> | RMSE        | System       | R <sup>2</sup> | RMSE        |
| <b>0</b>  | -                   | <b>0.27</b>    | <b>5.72</b> | -            | <b>0.25</b>    | <b>5.80</b> |
| 1         | 2jm6                | 0.21           | 5.28        | 2jm6         | 0.24           | 5.17        |
| 2         | 1e4x                | 0.25           | 4.89        | 1e4x         | 0.28           | 4.78        |
| 3         | 1bbz                | 0.35           | 4.42        | 1bbz         | 0.35           | 4.41        |
| 4         | 2oi9                | 0.42           | 4.13        | 1axc         | 0.24           | 4.09        |
| 5         | 4j9g                | 0.48           | 3.88        | 4j9g         | 0.29           | 3.86        |
| 6         | 4j9i                | 0.52           | 3.67        | 4j9i         | 0.37           | 3.57        |
| 7         | 4j9f                | 0.57           | 3.47        | 4j9f         | 0.39           | 3.42        |
| 8         | 1abo                | 0.62           | 3.23        | 1abo         | 0.43           | 3.25        |
| 9         | 1axc                | 0.49           | 3.04        | 2oi9         | 0.46           | 3.14        |
| 10        | 1tp5                | 0.51           | 2.93        | 1tp5         | 0.48           | 3.00        |
| 11        | 2v8f                | 0.54           | 2.84        | 1mw4         | 0.51           | 2.88        |
| <b>12</b> | <b>2v8c</b>         | <b>0.58</b>    | <b>2.74</b> | <b>1sem</b>  | <b>0.54</b>    | <b>2.76</b> |

<sup>a</sup>Number of points left out from full set.

<sup>b</sup>The system that was left out in the actual step.



**Table S11 Comparison of linear regression results for different semi-empirical parametric methods for model 1SCF Hybrid 3**

|                                  | PM7       |              | PM6-D3H4X |              | PM6-DH2X  |              |
|----------------------------------|-----------|--------------|-----------|--------------|-----------|--------------|
|                                  | Full set  | Tailored set | Full set  | Tailored set | Full set  | Tailored set |
| <b><math>\beta \neq 0</math></b> |           |              |           |              |           |              |
| <b>R<sup>2</sup></b>             | 0.27      | 0.58         | 0.21      | 0.53         | 0.22      | 0.47         |
| <b>RMSE</b>                      | 5.72      | 2.74         | 5.94      | 2.92         | 5.90      | 3.09         |
| <b><math>\alpha</math></b>       | 3.11E-02  | 3.21E-02     | 3.77E-02  | 4.39E-02     | 4.24E-02  | 4.70E-02     |
| <b><math>\Delta\alpha</math></b> | 8.04E-03  | 5.05E-03     | 1.15E-02  | 7.76E-03     | 1.25E-02  | 9.29E-03     |
| <b><math>\beta</math></b>        | -4.77E+00 | -2.46E+00    | -5.77E+00 | -2.58E+00    | -5.48E+00 | -2.61E+00    |
| <b><math>\Delta\beta</math></b>  | 2.10E+00  | 1.28E+00     | 2.15E+00  | 1.41E+00     | 2.16E+00  | 1.56E+00     |
| <b><math>\beta = 0</math></b>    |           |              |           |              |           |              |
| <b>R<sup>2</sup></b>             | 0.81      | 0.93         | 0.78      | 0.92         | 0.79      | 0.91         |
| <b>RMSE</b>                      | 6.07      | 2.91         | 6.45      | 3.09         | 6.35      | 3.24         |
| <b><math>\alpha</math></b>       | 4.76E-02  | 4.10E-02     | 6.57E-02  | 5.70E-02     | 7.11E-02  | 6.14E-02     |
| <b><math>\Delta\alpha</math></b> | 3.59E-03  | 2.09E-03     | 5.35E-03  | 3.09E-03     | 5.67E-03  | 3.51E-03     |

**Table S12 Ligand-based descriptors<sup>a</sup> generated with PaDEL program package.** For all descriptors a normalized version was calculated by division with the number of atoms (NA).

| Descriptor type      | Count | Descriptor(s)                                                                                                                                                                                                                                                                                                                                                                                                                                                                                                                                                                                                                                                                                                                                                                                                                                                                                                                                                                                                                                                                                                                                                                                                                                                                                                                                                                                                                                                                                                                                                                                                                                                                                                                                                                                                                                                                                                                                                                                                                                                                                                                                                                                                                                                                                                                                                                                                                                                                                                                                                                    |
|----------------------|-------|----------------------------------------------------------------------------------------------------------------------------------------------------------------------------------------------------------------------------------------------------------------------------------------------------------------------------------------------------------------------------------------------------------------------------------------------------------------------------------------------------------------------------------------------------------------------------------------------------------------------------------------------------------------------------------------------------------------------------------------------------------------------------------------------------------------------------------------------------------------------------------------------------------------------------------------------------------------------------------------------------------------------------------------------------------------------------------------------------------------------------------------------------------------------------------------------------------------------------------------------------------------------------------------------------------------------------------------------------------------------------------------------------------------------------------------------------------------------------------------------------------------------------------------------------------------------------------------------------------------------------------------------------------------------------------------------------------------------------------------------------------------------------------------------------------------------------------------------------------------------------------------------------------------------------------------------------------------------------------------------------------------------------------------------------------------------------------------------------------------------------------------------------------------------------------------------------------------------------------------------------------------------------------------------------------------------------------------------------------------------------------------------------------------------------------------------------------------------------------------------------------------------------------------------------------------------------------|
| Acidic group count   | 1     | nAcid                                                                                                                                                                                                                                                                                                                                                                                                                                                                                                                                                                                                                                                                                                                                                                                                                                                                                                                                                                                                                                                                                                                                                                                                                                                                                                                                                                                                                                                                                                                                                                                                                                                                                                                                                                                                                                                                                                                                                                                                                                                                                                                                                                                                                                                                                                                                                                                                                                                                                                                                                                            |
| ALOGP                | 3     | ALogP, ALogp2, AMR                                                                                                                                                                                                                                                                                                                                                                                                                                                                                                                                                                                                                                                                                                                                                                                                                                                                                                                                                                                                                                                                                                                                                                                                                                                                                                                                                                                                                                                                                                                                                                                                                                                                                                                                                                                                                                                                                                                                                                                                                                                                                                                                                                                                                                                                                                                                                                                                                                                                                                                                                               |
| APol                 | 1     | apol                                                                                                                                                                                                                                                                                                                                                                                                                                                                                                                                                                                                                                                                                                                                                                                                                                                                                                                                                                                                                                                                                                                                                                                                                                                                                                                                                                                                                                                                                                                                                                                                                                                                                                                                                                                                                                                                                                                                                                                                                                                                                                                                                                                                                                                                                                                                                                                                                                                                                                                                                                             |
| Aromatic atoms count | 1     | naAromAtom                                                                                                                                                                                                                                                                                                                                                                                                                                                                                                                                                                                                                                                                                                                                                                                                                                                                                                                                                                                                                                                                                                                                                                                                                                                                                                                                                                                                                                                                                                                                                                                                                                                                                                                                                                                                                                                                                                                                                                                                                                                                                                                                                                                                                                                                                                                                                                                                                                                                                                                                                                       |
| Aromatic bonds count | 1     | nAromBond                                                                                                                                                                                                                                                                                                                                                                                                                                                                                                                                                                                                                                                                                                                                                                                                                                                                                                                                                                                                                                                                                                                                                                                                                                                                                                                                                                                                                                                                                                                                                                                                                                                                                                                                                                                                                                                                                                                                                                                                                                                                                                                                                                                                                                                                                                                                                                                                                                                                                                                                                                        |
| Atom count           | 14    | nAtom, nHeavyAtom, nH, nB, nC, nN, nO, nS, nP, nF, nCl, nBr, nI, nX                                                                                                                                                                                                                                                                                                                                                                                                                                                                                                                                                                                                                                                                                                                                                                                                                                                                                                                                                                                                                                                                                                                                                                                                                                                                                                                                                                                                                                                                                                                                                                                                                                                                                                                                                                                                                                                                                                                                                                                                                                                                                                                                                                                                                                                                                                                                                                                                                                                                                                              |
| Autocorrelation      | 346   | ATS0m, ATS1m, ATS2m, ATS3m, ATS4m, ATS5m, ATS6m, ATS7m, ATS8m, ATS0v, ATS1v, ATS2v, ATS3v, ATS4v, ATS5v, ATS6v, ATS7v, ATS8v, ATS0e, ATS1e, ATS2e, ATS3e, ATS4e, ATS5e, ATS6e, ATS7e, ATS8e, ATS0p, ATS1p, ATS2p, ATS3p, ATS4p, ATS5p, ATS6p, ATS7p, ATS8p, ATS0i, ATS1i, ATS2i, ATS3i, ATS4i, ATS5i, ATS6i, ATS7i, ATS8i, ATS0s, ATS1s, ATS2s, ATS3s, ATS4s, ATS5s, ATS6s, ATS7s, ATS8s, AATS0m, AATS1m, AATS2m, AATS3m, AATS4m, AATS5m, AATS6m, AATS7m, AATS8m, AATS0v, AATS1v, AATS2v, AATS3v, AATS4v, AATS5v, AATS6v, AATS7v, AATS8v, AATS0e, AATS1e, AATS2e, AATS3e, AATS4e, AATS5e, AATS6e, AATS7e, AATS8e, AATS0p, AATS1p, AATS2p, AATS3p, AATS4p, AATS5p, AATS6p, AATS7p, AATS8p, AATS0i, AATS1i, AATS2i, AATS3i, AATS4i, AATS5i, AATS6i, AATS7i, AATS8i, AATS0s, AATS1s, AATS2s, AATS3s, AATS4s, AATS5s, AATS6s, AATS7s, AATS8s, ATSC0c, ATSC1c, ATSC2c, ATSC3c, ATSC4c, ATSC5c, ATSC6c, ATSC7c, ATSC8c, ATSC0m, ATSC1m, ATSC2m, ATSC3m, ATSC4m, ATSC5m, ATSC6m, ATSC7m, ATSC8m, ATSC0v, ATSC1v, ATSC2v, ATSC3v, ATSC4v, ATSC5v, ATSC6v, ATSC7v, ATSC8v, ATSC0e, ATSC1e, ATSC2e, ATSC3e, ATSC4e, ATSC5e, ATSC6e, ATSC7e, ATSC8e, ATSC0p, ATSC1p, ATSC2p, ATSC3p, ATSC4p, ATSC5p, ATSC6p, ATSC7p, ATSC8p, ATSC0i, ATSC1i, ATSC2i, ATSC3i, ATSC4i, ATSC5i, ATSC6i, ATSC7i, ATSC8i, ATSC0s, ATSC1s, ATSC2s, ATSC3s, ATSC4s, ATSC5s, ATSC6s, ATSC7s, ATSC8s, AATSC0c, AATSC1c, AATSC2c, AATSC3c, AATSC4c, AATSC5c, AATSC6c, AATSC7c, AATSC8c, AATSC0m, AATSC1m, AATSC2m, AATSC3m, AATSC4m, AATSC5m, AATSC6m, AATSC7m, AATSC8m, AATSC0v, AATSC1v, AATSC2v, AATSC3v, AATSC4v, AATSC5v, AATSC6v, AATSC7v, AATSC8v, AATSC0e, AATSC1e, AATSC2e, AATSC3e, AATSC4e, AATSC5e, AATSC6e, AATSC7e, AATSC8e, AATSC0p, AATSC1p, AATSC2p, AATSC3p, AATSC4p, AATSC5p, AATSC6p, AATSC7p, AATSC8p, AATSC0i, AATSC1i, AATSC2i, AATSC3i, AATSC4i, AATSC5i, AATSC6i, AATSC7i, AATSC8i, AATSC0s, AATSC1s, AATSC2s, AATSC3s, AATSC4s, AATSC5s, AATSC6s, AATSC7s, AATSC8s, MATS1c, MATS2c, MATS3c, MATS4c, MATS5c, MATS6c, MATS7c, MATS8c, MATS1m, MATS2m, MATS3m, MATS4m, MATS5m, MATS6m, MATS7m, MATS8m, MATS1v, MATS2v, MATS3v, MATS4v, MATS5v, MATS6v, MATS7v, MATS8v, MATS1e, MATS2e, MATS3e, MATS4e, MATS5e, MATS6e, MATS7e, MATS8e, MATS1p, MATS2p, MATS3p, MATS4p, MATS5p, MATS6p, MATS7p, MATS8p, MATS1i, MATS2i, MATS3i, MATS4i, MATS5i, MATS6i, MATS7i, MATS8i, MATS1s, MATS2s, MATS3s, MATS4s, MATS5s, MATS6s, MATS7s, MATS8s, GATS1c, GATS2c, GATS3c, GATS4c, GATS5c, GATS6c, GATS7c, GATS8c, GATS1m, GATS2m, GATS3m, GATS4m, GATS5m, GATS6m, GATS7m, GATS8m, GATS1v, GATS2v, GATS3v, |

| Descriptor type             | Count | Descriptor(s)                                                                                                                                                                                                                                                                                                                                                                                                                                                                                                                                                                                                                                                                                                                                                                                                                                                                                                                                                                                                                                                                                                                                                                                                              |
|-----------------------------|-------|----------------------------------------------------------------------------------------------------------------------------------------------------------------------------------------------------------------------------------------------------------------------------------------------------------------------------------------------------------------------------------------------------------------------------------------------------------------------------------------------------------------------------------------------------------------------------------------------------------------------------------------------------------------------------------------------------------------------------------------------------------------------------------------------------------------------------------------------------------------------------------------------------------------------------------------------------------------------------------------------------------------------------------------------------------------------------------------------------------------------------------------------------------------------------------------------------------------------------|
| Barysz matrix               | 91    | GATS4v, GATS5v, GATS6v, GATS7v, GATS8v, GATS1e, GATS2e, GATS3e, GATS4e, GATS5e, GATS6e, GATS7e, GATS8e, GATS1p, GATS2p, GATS3p, GATS4p, GATS5p, GATS6p, GATS7p, GATS8p, GATS1i, GATS2i, GATS3i, GATS4i, GATS5i, GATS6i, GATS7i, GATS8i, GATS1s, GATS2s, GATS3s, GATS4s, GATS5s, GATS6s, GATS7s, GATS8s<br>SpAbs_DzZ, SpMax_DzZ, SpDiam_DzZ, SpAD_DzZ, SpMAD_DzZ, EE_DzZ, SM1_DzZ, VE1_DzZ, VE2_DzZ, VE3_DzZ, VR1_DzZ, VR2_DzZ, VR3_DzZ, SpAbs_Dzm, SpMax_Dzm, SpDiam_Dzm, SpAD_Dzm, SpMAD_Dzm, EE_Dzm, SM1_Dzm, VE1_Dzm, VE2_Dzm, VE3_Dzm, VR1_Dzm, VR2_Dzm, VR3_Dzm, SpAbs_Dzv, SpMax_Dzv, SpDiam_Dzv, SpAD_Dzv, SpMAD_Dzv, EE_Dzv, SM1_Dzv, VE1_Dzv, VE2_Dzv, VE3_Dzv, VR1_Dzv, VR2_Dzv, VR3_Dzv, SpAbs_Dze, SpMax_Dze, SpDiam_Dze, SpAD_Dze, SpMAD_Dze, EE_Dze, SM1_Dze, VE1_Dze, VE2_Dze, VE3_Dze, VR1_Dze, VR2_Dze, VR3_Dze, SpAbs_Dzp, SpMax_Dzp, SpDiam_Dzp, SpAD_Dzp, SpMAD_Dzp, EE_Dzp, SM1_Dzp, VE1_Dzp, VE2_Dzp, VE3_Dzp, VR1_Dzp, VR2_Dzp, VR3_Dzp, SpAbs_Dzi, SpMax_Dzi, SpDiam_Dzi, SpAD_Dzi, SpMAD_Dzi, EE_Dzi, SM1_Dzi, VE1_Dzi, VE2_Dzi, VE3_Dzi, VR1_Dzi, VR2_Dzi, VR3_Dzi, SpAbs_Dzs, SpMax_Dzs, SpDiam_Dzs, SpAD_Dzs, SpMAD_Dzs, EE_Dzs, SM1_Dzs, VE1_Dzs, VE2_Dzs, VE3_Dzs, VR1_Dzs, VR2_Dzs, VR3_Dzs |
| Basic group count           | 1     | nBase                                                                                                                                                                                                                                                                                                                                                                                                                                                                                                                                                                                                                                                                                                                                                                                                                                                                                                                                                                                                                                                                                                                                                                                                                      |
| BCUT                        | 6     | BCUTw-1l, BCUTw-1h, BCUTc-1l, BCUTc-1h, BCUTp-1l, BCUTp-1h                                                                                                                                                                                                                                                                                                                                                                                                                                                                                                                                                                                                                                                                                                                                                                                                                                                                                                                                                                                                                                                                                                                                                                 |
| Bond count                  | 10    | nBonds, nBonds2, nBondsS, nBondsS2, nBondsS3, nBondsD, nBondsD2, nBondsT, nBondsQ, nBondsM                                                                                                                                                                                                                                                                                                                                                                                                                                                                                                                                                                                                                                                                                                                                                                                                                                                                                                                                                                                                                                                                                                                                 |
| BPol                        | 1     | bpol                                                                                                                                                                                                                                                                                                                                                                                                                                                                                                                                                                                                                                                                                                                                                                                                                                                                                                                                                                                                                                                                                                                                                                                                                       |
| Burden modified eigenvalues | 96    | SpMax1_Bhm, SpMax2_Bhm, SpMax3_Bhm, SpMax4_Bhm, SpMax5_Bhm, SpMax6_Bhm, SpMax7_Bhm, SpMax8_Bhm, SpMin1_Bhm, SpMin2_Bhm, SpMin3_Bhm, SpMin4_Bhm, SpMin5_Bhm, SpMin6_Bhm, SpMin7_Bhm, SpMin8_Bhm, SpMax1_Bhv, SpMax2_Bhv, SpMax3_Bhv, SpMax4_Bhv, SpMax5_Bhv, SpMax6_Bhv, SpMax7_Bhv, SpMax8_Bhv, SpMin1_Bhv, SpMin2_Bhv, SpMin3_Bhv, SpMin4_Bhv, SpMin5_Bhv, SpMin6_Bhv, SpMin7_Bhv, SpMin8_Bhv, SpMax1_Bhe, SpMax2_Bhe, SpMax3_Bhe, SpMax4_Bhe, SpMax5_Bhe, SpMax6_Bhe, SpMax7_Bhe, SpMax8_Bhe, SpMin1_Bhe, SpMin2_Bhe, SpMin3_Bhe, SpMin4_Bhe, SpMin5_Bhe, SpMin6_Bhe, SpMin7_Bhe, SpMin8_Bhe, SpMax1_Bhp, SpMax2_Bhp, SpMax3_Bhp, SpMax4_Bhp, SpMax5_Bhp, SpMax6_Bhp, SpMax7_Bhp, SpMax8_Bhp, SpMin1_Bhp, SpMin2_Bhp, SpMin3_Bhp, SpMin4_Bhp, SpMin5_Bhp, SpMin6_Bhp, SpMin7_Bhp, SpMin8_Bhp, SpMax1_Bhi, SpMax2_Bhi, SpMax3_Bhi, SpMax4_Bhi, SpMax5_Bhi, SpMax6_Bhi, SpMax7_Bhi, SpMax8_Bhi, SpMin1_Bhi, SpMin2_Bhi, SpMin3_Bhi, SpMin4_Bhi, SpMin5_Bhi, SpMin6_Bhi, SpMin7_Bhi, SpMin8_Bhi, SpMax1_Bhs, SpMax2_Bhs, SpMax3_Bhs, SpMax4_Bhs, SpMax5_Bhs, SpMax6_Bhs, SpMax7_Bhs, SpMax8_Bhs, SpMin1_Bhs, SpMin2_Bhs, SpMin3_Bhs, SpMin4_Bhs, SpMin5_Bhs, SpMin6_Bhs, SpMin7_Bhs, SpMin8_Bhs                             |
| Carbon types                | 9     | C1SP1, C2SP1, C1SP2, C2SP2, C3SP2, C1SP3, C2SP3, C3SP3, C4SP3                                                                                                                                                                                                                                                                                                                                                                                                                                                                                                                                                                                                                                                                                                                                                                                                                                                                                                                                                                                                                                                                                                                                                              |
| Chi chain                   | 10    | SCH-3, SCH-4, SCH-5, SCH-6, SCH-7, VCH-3, VCH-4, VCH-5, VCH-6, VCH-7                                                                                                                                                                                                                                                                                                                                                                                                                                                                                                                                                                                                                                                                                                                                                                                                                                                                                                                                                                                                                                                                                                                                                       |

| Descriptor type                    | Count | Descriptor(s)                                                                                                                                                                                                                                                                                                                                                                                                                                                                                                                                                                                                                                                                                                                                                                                                                                                                                                                                                                                                                                                                                                                                                                                                                                                                                                                                                                                                                                                                                                                                                                                                                                                                                                                                                                                                                                                                                                                                                                                                                                                                                                                                                                                                                                                                                                                                                                                                                                                                                                                                                                                                                                                                                                                |
|------------------------------------|-------|------------------------------------------------------------------------------------------------------------------------------------------------------------------------------------------------------------------------------------------------------------------------------------------------------------------------------------------------------------------------------------------------------------------------------------------------------------------------------------------------------------------------------------------------------------------------------------------------------------------------------------------------------------------------------------------------------------------------------------------------------------------------------------------------------------------------------------------------------------------------------------------------------------------------------------------------------------------------------------------------------------------------------------------------------------------------------------------------------------------------------------------------------------------------------------------------------------------------------------------------------------------------------------------------------------------------------------------------------------------------------------------------------------------------------------------------------------------------------------------------------------------------------------------------------------------------------------------------------------------------------------------------------------------------------------------------------------------------------------------------------------------------------------------------------------------------------------------------------------------------------------------------------------------------------------------------------------------------------------------------------------------------------------------------------------------------------------------------------------------------------------------------------------------------------------------------------------------------------------------------------------------------------------------------------------------------------------------------------------------------------------------------------------------------------------------------------------------------------------------------------------------------------------------------------------------------------------------------------------------------------------------------------------------------------------------------------------------------------|
| Chi cluster                        | 8     | SC-3, SC-4, SC-5, SC-6, VC-3, VC-4, VC-5, VC-6                                                                                                                                                                                                                                                                                                                                                                                                                                                                                                                                                                                                                                                                                                                                                                                                                                                                                                                                                                                                                                                                                                                                                                                                                                                                                                                                                                                                                                                                                                                                                                                                                                                                                                                                                                                                                                                                                                                                                                                                                                                                                                                                                                                                                                                                                                                                                                                                                                                                                                                                                                                                                                                                               |
| Chi path cluster                   | 6     | SPC-4, SPC-5, SPC-6, VPC-4, VPC-5, VPC-6                                                                                                                                                                                                                                                                                                                                                                                                                                                                                                                                                                                                                                                                                                                                                                                                                                                                                                                                                                                                                                                                                                                                                                                                                                                                                                                                                                                                                                                                                                                                                                                                                                                                                                                                                                                                                                                                                                                                                                                                                                                                                                                                                                                                                                                                                                                                                                                                                                                                                                                                                                                                                                                                                     |
| Chi path                           | 32    | SP-0, SP-1, SP-2, SP-3, SP-4, SP-5, SP-6, SP-7, ASP-0, ASP-1, ASP-2, ASP-3, ASP-4, ASP-5, ASP-6, ASP-7, VP-0, VP-1, VP-2, VP-3, VP-4, VP-5, VP-6, VP-7, AVP-0, AVP-1, AVP-2, AVP-3, AVP-4, AVP-5, AVP-6, AVP-7                                                                                                                                                                                                                                                                                                                                                                                                                                                                                                                                                                                                                                                                                                                                                                                                                                                                                                                                                                                                                                                                                                                                                                                                                                                                                                                                                                                                                                                                                                                                                                                                                                                                                                                                                                                                                                                                                                                                                                                                                                                                                                                                                                                                                                                                                                                                                                                                                                                                                                               |
| Constitutional                     | 12    | Sv, Sse, Spe, Sare, Sp, Si, Mv, Mse, Mpe, Mare, Mp, Mi                                                                                                                                                                                                                                                                                                                                                                                                                                                                                                                                                                                                                                                                                                                                                                                                                                                                                                                                                                                                                                                                                                                                                                                                                                                                                                                                                                                                                                                                                                                                                                                                                                                                                                                                                                                                                                                                                                                                                                                                                                                                                                                                                                                                                                                                                                                                                                                                                                                                                                                                                                                                                                                                       |
| Crippen logP and MR                | 2     | CrippenLogP, CrippenMR                                                                                                                                                                                                                                                                                                                                                                                                                                                                                                                                                                                                                                                                                                                                                                                                                                                                                                                                                                                                                                                                                                                                                                                                                                                                                                                                                                                                                                                                                                                                                                                                                                                                                                                                                                                                                                                                                                                                                                                                                                                                                                                                                                                                                                                                                                                                                                                                                                                                                                                                                                                                                                                                                                       |
| Detour matrix                      | 11    | SpMax_Dt, SpDiam_Dt, SpAD_Dt, SpMAD_Dt, EE_Dt, VE1_Dt, VE2_Dt, VE3_Dt, VR1_Dt, VR2_Dt, VR3_Dt                                                                                                                                                                                                                                                                                                                                                                                                                                                                                                                                                                                                                                                                                                                                                                                                                                                                                                                                                                                                                                                                                                                                                                                                                                                                                                                                                                                                                                                                                                                                                                                                                                                                                                                                                                                                                                                                                                                                                                                                                                                                                                                                                                                                                                                                                                                                                                                                                                                                                                                                                                                                                                |
| Eccentric connectivity index       | 1     | ECCEN                                                                                                                                                                                                                                                                                                                                                                                                                                                                                                                                                                                                                                                                                                                                                                                                                                                                                                                                                                                                                                                                                                                                                                                                                                                                                                                                                                                                                                                                                                                                                                                                                                                                                                                                                                                                                                                                                                                                                                                                                                                                                                                                                                                                                                                                                                                                                                                                                                                                                                                                                                                                                                                                                                                        |
| Atom type electrotopological state | 489   | nHBd, nwHBd, nHBa, nwHBa, nHBint2, nHBint3, nHBint4, nHBint5, nHBint6, nHBint7, nHBint8, nHBint9, nHBint10, nHsOH, nHdNH, nHsSH, nHsNH2, nHssNH, nHaaNH, nHsNH3p, nHssNH2p, nHsssNHp, nHtCH, nHdCH2, nHdsCH, nHaaCH, nHCHnX, nHCsats, nHCsatu, nHAvin, nHother, nHmisc, nsLi, nssBe, nssssBem, nsBH2, nssBH, nsssB, nssssBm, nsCH3, ndCH2, nssCH2, ntCH, ndsCH, naaCH, nsssCH, nddC, ntsC, ndssC, naasC, naaaC, nssssC, nsNH3p, nsNH2, nssNH2p, ndNH, nssNH, naaNH, ntN, nssNHp, ndsN, naaN, nsssN, nddsN, naasN, nssssNp, nsOH, ndO, nssO, naaO, naOm, nsOm, nsF, nsSiH3, nssSiH2, nssssSiH, nssssSi, nsPH2, nssPH, nsssP, ndsssP, nddsP, nssssP, nsSH, ndS, nssS, naaS, ndssS, nddsS, nssssS, nSm, nsCl, nsGeH3, nssGeH2, nssssGeH, nssssGe, nsAsH2, nssAsH, nsssAs, ndsssAs, nddsAs, nssssAs, nsSeH, ndSe, nssSe, naaSe, ndssSe, nssssSe, nddsSe, nsBr, nsSnH3, nssSnH2, nsssSnH, nssssSn, nsI, nsPbH3, nssPbH2, nssssPbH, nssssPb, SHBd, SwHBd, SHBa, SwHBa, SHBint2, SHBint3, SHBint4, SHBint5, SHBint6, SHBint7, SHBint8, SHBint9, SHBint10, SHsOH, SHdNH, SHsSH, SHsNH2, SHssNH, SHaaNH, SHsNH3p, SHssNH2p, SHsssNHp, SHtCH, SHdCH2, SHdsCH, SHaaCH, SHCHnX, SHCsats, SHCsatu, SHAvin, SHother, SHmisc, SsLi, SssBe, SssssBem, SsBH2, SssBH, SssssB, SssssBm, SsCH3, SdCH2, SssCH2, StCH, SdsCH, SaaCH, SssssCH, SddC, StsC, SdssC, SaasC, SaaaC, SssssC, SsNH3p, SsNH2, SssNH2p, SdNH, SssNH, SaaNH, StN, SssNHp, SdsN, SaaN, SsssN, SddsN, SaasN, SssssNp, SsOH, SdO, SssO, SaaO, SaOm, SsOm, SsF, SsSiH3, SssSiH2, SssssSiH, SssssSi, SsPH2, SssPH, SsssP, SdsssP, SddsP, SssssP, SsSH, SdS, SssS, SaaS, SdssS, SddssS, SssssS, SSm, SsCl, SsGeH3, SssGeH2, SssssGeH, SssssGe, SsAsH2, SssAsH, SsssAs, SdsssAs, SddsAs, SssssAs, SsSeH, SdSe, SssSe, SaaSe, SdssSe, SssssSe, SddssSe, SsBr, SsSnH3, SssSnH2, SsssSnH, SssssSn, SsI, SsPbH3, SssPbH2, SssssPbH, SssssPb, minHBd, minwHBd, minHBa, minwHBa, minHBint2, minHBint3, minHBint4, minHBint5, minHBint6, minHBint7, minHBint8, minHBint9, minHBint10, minHsOH, minHdNH, minHsSH, minHsNH2, minHssNH, minHaaNH, minHsNH3p, minHssNH2p, minHsssNHp, minHtCH, minHdCH2, minHdsCH, minHaaCH, minHCHnX, minHCsats, minHCsatu, minHAvin, minHother, minHmisc, minsLi, minssBe, minssssBem, minsBH2, minssBH, minssssB, minssssBm, minsCH3, mindCH2, minssCH2, mintCH, mindsCH, minaaCH, minssssCH, minddC, mintsC, mindssC, minaaC, minaaaC, minssssC, minsNH3p, minsNH2, minssNH2p, mindNH, minssNH, minaaNH, minaaNH, minssNHp, mindsN, minaaN, minssssN, minddsN, minaaN, minssssNp, minsOH, mindO, minssO, minaaO, minaaOm, minsOm, minsF, minsSiH3, minssSiH2, minssssSiH, minssssSi, minsPH2, minssPH, minssP, mindsssP, minddsP, minssssP, minsSH, minds, |

| Descriptor type            | Count | Descriptor(s)                                                                                                                                                                                                                                                                                                                                                                                                                                                                                                                                                                                                                                                                                                                                                                                                                                                                                                                                                                                                                                                                                                                                                                                                                                                                                                                                                                                                                                                                                                                                                                                                                                       |
|----------------------------|-------|-----------------------------------------------------------------------------------------------------------------------------------------------------------------------------------------------------------------------------------------------------------------------------------------------------------------------------------------------------------------------------------------------------------------------------------------------------------------------------------------------------------------------------------------------------------------------------------------------------------------------------------------------------------------------------------------------------------------------------------------------------------------------------------------------------------------------------------------------------------------------------------------------------------------------------------------------------------------------------------------------------------------------------------------------------------------------------------------------------------------------------------------------------------------------------------------------------------------------------------------------------------------------------------------------------------------------------------------------------------------------------------------------------------------------------------------------------------------------------------------------------------------------------------------------------------------------------------------------------------------------------------------------------|
| Extended topochemical atom | 43    | minssS, minaaS, mindssS, minddssS, minsssssS, minSm, minsCl, minsGeH3, minssGeH2, minsssGeH, minsssssGe, minsAsH2, minssAsH, minsssAs, mindsssAs, minddsAs, minsssssAs, minsSeH, mindSe, minssSe, minaaSe, mindssSe, minsssssSe, minddssSe, minsBr, minsSnH3, minssSnH2, minsssSnH, minsssssSn, minsI, minsPbH3, minssPbH2, minsssPbH, minsssssPb, maxHBd, maxwHBd, maxHBa, maxwHBa, maxHBint2, maxHBint3, maxHBint4, maxHBint5, maxHBint6, maxHBint7, maxHBint8, maxHBint9, maxHBint10, maxHsOH, maxHdNH, maxHsSH, maxHsNH2, maxHssNH, maxHaaNH, maxHsNH3p, maxHssNH2p, maxHsssNHp, maxHtCH, maxHdCH2, maxHdsCH, maxHaaCH, maxHCHnX, maxHCsats, maxHCsatu, maxHAvin, maxHother, maxHmisc, maxsLi, maxssBe, maxsssssBem, maxsBH2, maxssBH, maxsssB, maxsssssBm, maxsCH3, maxdCH2, maxssCH2, maxtCH, maxdsCH, maxaaCH, maxsssCH, maxddC, maxtsC, maxdssC, maxaasC, maxaaC, maxsssssC, maxsNH3p, maxsNH2, maxssNH2p, maxdNH, maxssNH, maxaaNH, maxtN, maxssNHp, maxdsN, maxaaN, maxsssN, maxddsN, maxaasN, maxsssssNp, maxsOH, maxdO, maxssO, maxaaO, maxaOm, maxsOm, maxsF, maxsSiH3, maxssSiH2, maxsssSiH, maxsssssSi, maxsPH2, maxssPH, maxsssP, maxdsssP, maxddsP, maxsssssP, maxsSH, maxdS, maxssS, maxaaS, maxdssS, maxddssS, maxsssssS, maxSm, maxsCl, maxsGeH3, maxssGeH2, maxsssGeH, maxsssssGe, maxsAsH2, maxssAsH, maxsssAs, maxdsssAs, maxddsAs, maxsssssAs, maxsSeH, maxdSe, maxssSe, maxaaSe, maxdssSe, maxsssssSe, maxddssSe, maxsBr, maxsSnH3, maxssSnH2, maxsssSnH, maxsssssSn, maxsI, maxsPbH3, maxssPbH2, maxsssPbH, maxsssssPb, sumI, meanI, hmax, gmax, hmin, gmin, LipoaffinityIndex, MAXDN, MAXDP, DELS, MAXDN2, MAXDP2, DELS2 |
| FMFDescriptor              | 1     | ETA_Alpha, ETA_AlphaP, ETA_dAlpha_A, ETA_dAlpha_B, ETA_Epsilon_1, ETA_Epsilon_2, ETA_Epsilon_3, ETA_Epsilon_4, ETA_Epsilon_5, ETA_dEpsilon_A, ETA_dEpsilon_B, ETA_dEpsilon_C, ETA_dEpsilon_D, ETA_Psi_1, ETA_dPsi_A, ETA_dPsi_B, ETA_Shape_P, ETA_Shape_Y, ETA_Shape_X, ETA_Beta, ETA_BetaP, ETA_Beta_s, ETA_BetaP_s, ETA_Beta_ns, ETA_BetaP_ns, ETA_dBeta, ETA_dBetaP, ETA_Beta_ns_d, ETA_BetaP_ns_d, ETA_Eta, ETA_EtaP, ETA_Eta_R, ETA_Eta_F, ETA_EtaP_F, ETA_Eta_L, ETA_EtaP_L, ETA_Eta_R_L, ETA_Eta_F_L, ETA_EtaP_F_L, ETA_Eta_B, ETA_EtaP_B, ETA_Eta_B_RC, ETA_EtaP_B_RC                                                                                                                                                                                                                                                                                                                                                                                                                                                                                                                                                                                                                                                                                                                                                                                                                                                                                                                                                                                                                                                                       |
| Fragment complexity        | 1     | fragC                                                                                                                                                                                                                                                                                                                                                                                                                                                                                                                                                                                                                                                                                                                                                                                                                                                                                                                                                                                                                                                                                                                                                                                                                                                                                                                                                                                                                                                                                                                                                                                                                                               |
| Hbond acceptor count       | 4     | nHBAcc, nHBAcc2, nHBAcc3, nHBAcc_Lipinski                                                                                                                                                                                                                                                                                                                                                                                                                                                                                                                                                                                                                                                                                                                                                                                                                                                                                                                                                                                                                                                                                                                                                                                                                                                                                                                                                                                                                                                                                                                                                                                                           |
| Hbond donor count          | 2     | nHBDon, nHBDon_Lipinski                                                                                                                                                                                                                                                                                                                                                                                                                                                                                                                                                                                                                                                                                                                                                                                                                                                                                                                                                                                                                                                                                                                                                                                                                                                                                                                                                                                                                                                                                                                                                                                                                             |
| Hybridization ratio        | 1     | HybRatio                                                                                                                                                                                                                                                                                                                                                                                                                                                                                                                                                                                                                                                                                                                                                                                                                                                                                                                                                                                                                                                                                                                                                                                                                                                                                                                                                                                                                                                                                                                                                                                                                                            |
| Information content        | 42    | IC0, IC1, IC2, IC3, IC4, IC5, TIC0, TIC1, TIC2, TIC3, TIC4, TIC5, SIC0, SIC1, SIC2, SIC3, SIC4, SIC5, CIC0, CIC1, CIC2, CIC3, CIC4, CIC5, BIC0, BIC1, BIC2, BIC3, BIC4, BIC5, MIC0, MIC1, MIC2, MIC3, MIC4, MIC5, ZMIC0, ZMIC1, ZMIC2, ZMIC3, ZMIC4, ZMIC5                                                                                                                                                                                                                                                                                                                                                                                                                                                                                                                                                                                                                                                                                                                                                                                                                                                                                                                                                                                                                                                                                                                                                                                                                                                                                                                                                                                          |
| Kappa shape indices        | 3     | Kier1, Kier2, Kier3                                                                                                                                                                                                                                                                                                                                                                                                                                                                                                                                                                                                                                                                                                                                                                                                                                                                                                                                                                                                                                                                                                                                                                                                                                                                                                                                                                                                                                                                                                                                                                                                                                 |
| Largest chain              | 1     | nAtomLC                                                                                                                                                                                                                                                                                                                                                                                                                                                                                                                                                                                                                                                                                                                                                                                                                                                                                                                                                                                                                                                                                                                                                                                                                                                                                                                                                                                                                                                                                                                                                                                                                                             |
| Largest Pi system          | 1     | nAtomP                                                                                                                                                                                                                                                                                                                                                                                                                                                                                                                                                                                                                                                                                                                                                                                                                                                                                                                                                                                                                                                                                                                                                                                                                                                                                                                                                                                                                                                                                                                                                                                                                                              |
| Longest aliphatic chain    | 1     | nAtomLAC                                                                                                                                                                                                                                                                                                                                                                                                                                                                                                                                                                                                                                                                                                                                                                                                                                                                                                                                                                                                                                                                                                                                                                                                                                                                                                                                                                                                                                                                                                                                                                                                                                            |

| Descriptor type                          | Count | Descriptor(s)                                                                                                                                                                                                                                                                                                                                                                                                                                                                                                                                                                                                                                                                                                                           |
|------------------------------------------|-------|-----------------------------------------------------------------------------------------------------------------------------------------------------------------------------------------------------------------------------------------------------------------------------------------------------------------------------------------------------------------------------------------------------------------------------------------------------------------------------------------------------------------------------------------------------------------------------------------------------------------------------------------------------------------------------------------------------------------------------------------|
| Mannhold LogP                            | 1     | MLogP                                                                                                                                                                                                                                                                                                                                                                                                                                                                                                                                                                                                                                                                                                                                   |
| McGowan volume                           | 1     | McGowan_Volume                                                                                                                                                                                                                                                                                                                                                                                                                                                                                                                                                                                                                                                                                                                          |
| Molecular distance edge                  | 19    | MDEC-11, MDEC-12, MDEC-13, MDEC-14, MDEC-22, MDEC-23, MDEC-24, MDEC-33, MDEC-34, MDEC-44, MDEO-11, MDEO-12, MDEO-22, MDEN-11, MDEN-12, MDEN-13, MDEN-22, MDEN-23, MDEN-33                                                                                                                                                                                                                                                                                                                                                                                                                                                                                                                                                               |
| Molecular linear free energy relation    | 6     | MLFER_A, MLFER_BH, MLFER_BO, MLFER_S, MLFER_E, MLFER_L                                                                                                                                                                                                                                                                                                                                                                                                                                                                                                                                                                                                                                                                                  |
| Path counts                              | 22    | MPC2, MPC3, MPC4, MPC5, MPC6, MPC7, MPC8, MPC9, MPC10, TPC, piPC1, piPC2, piPC3, piPC4, piPC5, piPC6, piPC7, piPC8, piPC9, piPC10, TpiPC, R_TpiPCTPC                                                                                                                                                                                                                                                                                                                                                                                                                                                                                                                                                                                    |
| Petitjean number                         | 1     | PetitjeanNumber                                                                                                                                                                                                                                                                                                                                                                                                                                                                                                                                                                                                                                                                                                                         |
| Ring count                               | 68    | nRing, n3Ring, n4Ring, n5Ring, n6Ring, n7Ring, n8Ring, n9Ring, n10Ring, n11Ring, n12Ring, nG12Ring, nFRing, nF4Ring, nF5Ring, nF6Ring, nF7Ring, nF8Ring, nF9Ring, nF10Ring, nF11Ring, nF12Ring, nFG12Ring, nHeteroRing, n3HeteroRing, n4HeteroRing, n5HeteroRing, n6HeteroRing, n7HeteroRing, n8HeteroRing, n9HeteroRing, n10HeteroRing, n11HeteroRing, n12HeteroRing, nG12HeteroRing, nFHeteroRing, nF4HeteroRing, nF5HeteroRing, nF6HeteroRing, nF7HeteroRing, nF8HeteroRing, nF9HeteroRing, nF10HeteroRing, nF11HeteroRing, nF12HeteroRing, nFG12HeteroRing, nTHeteroRing, nT4HeteroRing, nT5HeteroRing, nT6HeteroRing, nT7HeteroRing, nT8HeteroRing, nT9HeteroRing, nT10HeteroRing, nT11HeteroRing, nT12HeteroRing, nTG12HeteroRing |
| Rotatable bonds count                    | 4     | nRotB, RotBFrac, nRotBt, RotBtFrac                                                                                                                                                                                                                                                                                                                                                                                                                                                                                                                                                                                                                                                                                                      |
| Rule of five                             | 1     | LipinskiFailures                                                                                                                                                                                                                                                                                                                                                                                                                                                                                                                                                                                                                                                                                                                        |
| Topological                              | 3     | topoRadius, topoDiameter, topoShape                                                                                                                                                                                                                                                                                                                                                                                                                                                                                                                                                                                                                                                                                                     |
| Topological charge                       | 21    | GGI1, GGI2, GGI3, GGI4, GGI5, GGI6, GGI7, GGI8, GGI9, GGI10, JGI1, JGI2, JGI3, JGI4, JGI5, JGI6, JGI7, JGI8, JGI9, JGI10, JGT                                                                                                                                                                                                                                                                                                                                                                                                                                                                                                                                                                                                           |
| Topological distance matrix              | 11    | SpMax_D, SpDiam_D, SpAD_D, SpMAD_D, EE_D, VE1_D, VE2_D, VE3_D, VR1_D, VR2_D, VR3_D                                                                                                                                                                                                                                                                                                                                                                                                                                                                                                                                                                                                                                                      |
| Topological polar surface area           | 1     | TopoPSA                                                                                                                                                                                                                                                                                                                                                                                                                                                                                                                                                                                                                                                                                                                                 |
| Van der Waals volume                     | 1     | VABC                                                                                                                                                                                                                                                                                                                                                                                                                                                                                                                                                                                                                                                                                                                                    |
| Vertex adjacency information (magnitude) | 1     | vAdjMat                                                                                                                                                                                                                                                                                                                                                                                                                                                                                                                                                                                                                                                                                                                                 |
| Walk counts                              | 20    | MWC2, MWC3, MWC4, MWC5, MWC6, MWC7, MWC8, MWC9, MWC10, TWC, SRW2, SRW3, SRW4, SRW5, SRW6, SRW7, SRW8, SRW9, SRW10, TSRW                                                                                                                                                                                                                                                                                                                                                                                                                                                                                                                                                                                                                 |
| Weight                                   | 2     | MW, AMW                                                                                                                                                                                                                                                                                                                                                                                                                                                                                                                                                                                                                                                                                                                                 |
| Weighted path                            | 5     | WTPT-1, WTPT-2, WTPT-3, WTPT-4, WTPT-5                                                                                                                                                                                                                                                                                                                                                                                                                                                                                                                                                                                                                                                                                                  |
| Wiener numbers                           | 2     | WPATH, WPOL                                                                                                                                                                                                                                                                                                                                                                                                                                                                                                                                                                                                                                                                                                                             |
| XLogP                                    | 1     | XLogP                                                                                                                                                                                                                                                                                                                                                                                                                                                                                                                                                                                                                                                                                                                                   |
| Zagreb index                             | 1     | Zagreb                                                                                                                                                                                                                                                                                                                                                                                                                                                                                                                                                                                                                                                                                                                                  |

<sup>a</sup>Descriptors are detailed in Yap et al (2011)<sup>27</sup>.

**Table S13 Correlation of filtered descriptors with binding free energy ( $\Delta G_b$ ) and calculated reaction enthalpy ( $\Delta_r H$ ) expressed in  $R^2$  values**

| <b>Descriptor</b> | <b>Correlation with <math>\Delta G_b</math> (<math>R^2</math>)</b> | <b>Correlation with <math>\Delta_r H</math> (<math>R^2</math>)</b> |
|-------------------|--------------------------------------------------------------------|--------------------------------------------------------------------|
| ATSC3e            | 0.28                                                               | 2.51E-02                                                           |
| AATS0m            | 0.25                                                               | 1.85E-02                                                           |
| maxHdsCH          | 0.24                                                               | 2.27E-02                                                           |
| maxHother         | 0.24                                                               | 2.27E-02                                                           |
| ATSC4m            | 0.23                                                               | 8.47E-03                                                           |
| AATSC0m           | 0.22                                                               | 2.11E-02                                                           |
| nAtomP            | 0.22                                                               | 1.49E-03                                                           |
| <b>MW/NA</b>      | <b>0.21</b>                                                        | <b>5.16E-06</b>                                                    |
| minHdsCH          | 0.19                                                               | 5.56E-03                                                           |
| minHother         | 0.19                                                               | 5.56E-03                                                           |
| AATS1m            | 0.19                                                               | 2.52E-06                                                           |
| AATS3m            | 0.17                                                               | 3.72E-03                                                           |
| GATS5c            | 0.16                                                               | 4.80E-03                                                           |
| AATS2m            | 0.16                                                               | 3.23E-05                                                           |
| VE1_Dzm           | 0.15                                                               | 3.17E-02                                                           |
| VE1_DzZ           | 0.15                                                               | 3.17E-02                                                           |
| AATSC4e           | 0.15                                                               | 3.94E-02                                                           |
| <b>NHA/NA</b>     | <b>0.14</b>                                                        | <b>1.12E-02</b>                                                    |
| Mv                | 0.14                                                               | 5.60E-04                                                           |
| AATSC2e           | 0.13                                                               | 2.85E-02                                                           |
| GATS1m            | 0.13                                                               | 3.67E-02                                                           |
| AATS4p            | 0.12                                                               | 9.23E-05                                                           |
| AATS0v            | 0.12                                                               | 6.04E-03                                                           |
| AATS4v            | 0.11                                                               | 2.83E-02                                                           |
| AATS1v            | 0.11                                                               | 1.17E-02                                                           |
| <b>NHB/NB</b>     | <b>0.10</b>                                                        | <b>2.15E-02</b>                                                    |
| BIC5              | 0.10                                                               | 8.53E-03                                                           |
| AATS6i            | 0.10                                                               | 3.78E-02                                                           |
| SIC5              | 0.10                                                               | 3.97E-04                                                           |
| nHeteroRing       | 0.09                                                               | 2.01E-02                                                           |
| ATSC7i            | 0.09                                                               | 1.31E-02                                                           |

**Table S14 Multiple linear regression results for  $\Delta G_b$  models with calculated  $\Delta_r H$  ( $\alpha_1$  in Eq. 3) and selected ligand-based descriptors ( $\alpha_2$ ) NHA/NA or NHB/NB. A systematic procedure (see Table S5) was applied to identify outliers and form tailored sets of the remaining points. Parameters of the final tailored sets featured in the main text are highlighted in boldface.**

| $N_o^a$                             | System <sup>b</sup> | $R^2$       | RMSE        | $\alpha_1$      | $\Delta\alpha_1$ | $t(\alpha_1)$   | $\alpha_2$       | $\Delta\alpha_2$ | $t(\alpha_2)$    | $\beta$         | $\Delta\beta$   | $t(\beta)$      |
|-------------------------------------|---------------------|-------------|-------------|-----------------|------------------|-----------------|------------------|------------------|------------------|-----------------|-----------------|-----------------|
| $\beta \neq 0$ NHA <sup>c</sup> /NA |                     |             |             |                 |                  |                 |                  |                  |                  |                 |                 |                 |
| 0                                   | -                   | 0.41        | 1.30        | 1.21E-02        | 2.81E-03         | 4.30E+00        | -2.58E+01        | 7.30E+00         | -3.54E+00        | 6.63E+00        | 3.77E+00        | 1.76E+00        |
| 1                                   | 2roc                | 0.46        | 1.16        | 1.18E-02        | 2.53E-03         | 4.66E+00        | -2.49E+01        | 6.56E+00         | -3.79E+00        | 6.20E+00        | 3.39E+00        | 1.83E+00        |
| 2                                   | 3ptb_pad            | 0.49        | 1.10        | 1.10E-02        | 2.42E-03         | 4.57E+00        | -2.79E+01        | 6.35E+00         | -4.39E+00        | 7.54E+00        | 3.26E+00        | 2.31E+00        |
| 3                                   | 2qbx                | 0.55        | 1.04        | 1.22E-02        | 2.34E-03         | 5.22E+00        | -2.88E+01        | 6.02E+00         | -4.79E+00        | 8.14E+00        | 3.09E+00        | 2.63E+00        |
| 4                                   | 1dpp                | 0.61        | 0.98        | 1.30E-02        | 2.24E-03         | 5.81E+00        | -3.35E+01        | 6.04E+00         | -5.54E+00        | 1.07E+01        | 3.13E+00        | 3.41E+00        |
| 5                                   | <b>1sem</b>         | <b>0.60</b> | <b>0.94</b> | <b>1.26E-02</b> | <b>2.16E-03</b>  | <b>5.80E+00</b> | <b>-3.09E+01</b> | <b>5.93E+00</b>  | <b>-5.22E+00</b> | <b>9.25E+00</b> | <b>3.08E+00</b> | <b>3.01E+00</b> |
| 6                                   | 2oi9                | 0.65        | 0.90        | 1.35E-02        | 2.11E-03         | 6.40E+00        | -3.15E+01        | 5.66E+00         | -5.57E+00        | 9.63E+00        | 2.94E+00        | 3.28E+00        |
| 7                                   | 1pyl                | 0.67        | 0.86        | 1.33E-02        | 2.02E-03         | 6.60E+00        | -3.10E+01        | 5.42E+00         | -5.72E+00        | 9.28E+00        | 2.82E+00        | 3.29E+00        |
| 8                                   | 2nl9                | 0.65        | 0.82        | 1.21E-02        | 2.04E-03         | 5.94E+00        | -3.03E+01        | 5.21E+00         | -5.81E+00        | 8.80E+00        | 2.71E+00        | 3.24E+00        |
| 9                                   | 2gsi                | 0.68        | 0.79        | 1.22E-02        | 1.95E-03         | 6.28E+00        | -3.22E+01        | 5.09E+00         | -6.33E+00        | 9.83E+00        | 2.65E+00        | 3.70E+00        |
| $\beta = 0$                         |                     |             |             |                 |                  |                 |                  |                  |                  |                 |                 |                 |
| 0                                   | -                   | 0.97        | 1.35        | 1.10E-02        | 2.82E-03         | 3.92E+00        | -1.31E+01        | 9.10E-01         | -1.44E+01        | -               | -               | -               |
| 1                                   | 2roc                | 0.98        | 1.21        | 1.08E-02        | 2.54E-03         | 4.25E+00        | -1.30E+01        | 8.21E-01         | -1.58E+01        | -               | -               | -               |
| 2                                   | 3ptb_pad            | 0.98        | 1.18        | 9.99E-03        | 2.50E-03         | 3.99E+00        | -1.33E+01        | 8.18E-01         | -1.63E+01        | -               | -               | -               |
| 3                                   | 2qbx                | 0.98        | 1.13        | 1.10E-02        | 2.47E-03         | 4.46E+00        | -1.31E+01        | 7.94E-01         | -1.65E+01        | -               | -               | -               |
| 4                                   | 1dpp                | 0.98        | 1.13        | 1.12E-02        | 2.47E-03         | 4.53E+00        | -1.30E+01        | 8.01E-01         | -1.63E+01        | -               | -               | -               |
| 5                                   | 1sem                | 0.98        | 1.06        | 1.09E-02        | 2.31E-03         | 4.71E+00        | -1.32E+01        | 7.53E-01         | -1.76E+01        | -               | -               | -               |
| 6                                   | 2oi9                | 0.99        | 1.03        | 1.17E-02        | 2.30E-03         | 5.07E+00        | -1.31E+01        | 7.38E-01         | -1.78E+01        | -               | -               | -               |
| 7                                   | 1pyl                | 0.99        | 0.99        | 1.16E-02        | 2.21E-03         | 5.23E+00        | -1.32E+01        | 7.12E-01         | -1.86E+01        | -               | -               | -               |
| 8                                   | 2nl9                | 0.99        | 0.95        | 1.03E-02        | 2.22E-03         | 4.63E+00        | -1.35E+01        | 6.95E-01         | -1.94E+01        | -               | -               | -               |
| 9                                   | 2gsi                | 0.99        | 0.94        | 1.02E-02        | 2.21E-03         | 4.62E+00        | -1.35E+01        | 6.95E-01         | -1.94E+01        | -               | -               | -               |
| $\beta \neq 0$ NHB <sup>d</sup> /NB |                     |             |             |                 |                  |                 |                  |                  |                  |                 |                 |                 |
| 0                                   | -                   | 0.38        | 1.33        | 1.24E-02        | 2.90E-03         | 4.28E+00        | -2.08E+01        | 6.56E+00         | -3.17E+00        | 4.28E+00        | 3.47E+00        | 1.24E+00        |
| 1                                   | 2roc                | 0.43        | 1.19        | 1.21E-02        | 2.59E-03         | 4.66E+00        | -2.05E+01        | 5.87E+00         | -3.49E+00        | 4.18E+00        | 3.10E+00        | 1.35E+00        |
| 2                                   | 2qbx                | 0.49        | 1.13        | 1.33E-02        | 2.54E-03         | 5.23E+00        | -2.15E+01        | 5.63E+00         | -3.82E+00        | 4.81E+00        | 2.98E+00        | 1.61E+00        |
| 3                                   | 1dpp                | 0.56        | 1.06        | 1.45E-02        | 2.43E-03         | 5.98E+00        | -2.79E+01        | 5.85E+00         | -4.77E+00        | 8.34E+00        | 3.12E+00        | 2.67E+00        |
| 4                                   | 3ptb_pad            | 0.59        | 1.01        | 1.39E-02        | 2.33E-03         | 5.97E+00        | -2.94E+01        | 5.61E+00         | -5.25E+00        | 8.99E+00        | 2.98E+00        | 3.02E+00        |
| 5                                   | <b>1sem</b>         | <b>0.59</b> | <b>0.96</b> | <b>1.33E-02</b> | <b>2.23E-03</b>  | <b>5.99E+00</b> | <b>-2.73E+01</b> | <b>5.41E+00</b>  | <b>-5.05E+00</b> | <b>7.75E+00</b> | <b>2.89E+00</b> | <b>2.69E+00</b> |
| 6                                   | 2oi9                | 0.64        | 0.91        | 1.43E-02        | 2.16E-03         | 6.64E+00        | -2.81E+01        | 5.14E+00         | -5.47E+00        | 8.25E+00        | 2.75E+00        | 3.01E+00        |
| 7                                   | 2v8c                | 0.66        | 0.87        | 1.41E-02        | 2.08E-03         | 6.78E+00        | -2.85E+01        | 4.94E+00         | -5.76E+00        | 8.36E+00        | 2.64E+00        | 3.17E+00        |
| 8                                   | 2nl9                | 0.64        | 0.84        | 1.29E-02        | 2.10E-03         | 6.12E+00        | -2.78E+01        | 4.77E+00         | -5.83E+00        | 7.88E+00        | 2.55E+00        | 3.09E+00        |
| 9                                   | 2gsi                | 0.68        | 0.80        | 1.31E-02        | 2.02E-03         | 6.47E+00        | -2.95E+01        | 4.66E+00         | -6.33E+00        | 8.82E+00        | 2.49E+00        | 3.53E+00        |
| $\beta = 0$                         |                     |             |             |                 |                  |                 |                  |                  |                  |                 |                 |                 |
| 0                                   | -                   | 0.97        | 1.35        | 1.14E-02        | 2.81E-03         | 4.07E+00        | -1.28E+01        | 8.94E-01         | -1.43E+01        | -               | -               | -               |
| 1                                   | 2roc                | 0.98        | 1.22        | 1.12E-02        | 2.53E-03         | 4.41E+00        | -1.27E+01        | 8.04E-01         | -1.57E+01        | -               | -               | -               |
| 2                                   | 2qbx                | 0.98        | 1.17        | 1.22E-02        | 2.49E-03         | 4.88E+00        | -1.25E+01        | 7.81E-01         | -1.60E+01        | -               | -               | -               |
| 3                                   | 1dpp                | 0.98        | 1.16        | 1.24E-02        | 2.47E-03         | 5.01E+00        | -1.24E+01        | 7.77E-01         | -1.59E+01        | -               | -               | -               |
| 4                                   | 3ptb_pad            | 0.98        | 1.13        | 1.17E-02        | 2.44E-03         | 4.79E+00        | -1.27E+01        | 7.76E-01         | -1.63E+01        | -               | -               | -               |
| 5                                   | 1sem                | 0.98        | 1.05        | 1.13E-02        | 2.27E-03         | 4.99E+00        | -1.29E+01        | 7.28E-01         | -1.77E+01        | -               | -               | -               |
| 6                                   | 2oi9                | 0.99        | 1.02        | 1.21E-02        | 2.25E-03         | 5.39E+00        | -1.28E+01        | 7.10E-01         | -1.80E+01        | -               | -               | -               |
| 7                                   | 2v8c                | 0.99        | 0.99        | 1.19E-02        | 2.20E-03         | 5.39E+00        | -1.29E+01        | 7.00E-01         | -1.85E+01        | -               | -               | -               |
| 8                                   | 2nl9                | 0.99        | 0.95        | 1.06E-02        | 2.21E-03         | 4.79E+00        | -1.32E+01        | 6.83E-01         | -1.93E+01        | -               | -               | -               |
| 9                                   | 2gsi                | 0.99        | 0.95        | 1.05E-02        | 2.20E-03         | 4.79E+00        | -1.31E+01        | 6.82E-01         | -1.93E+01        | -               | -               | -               |

<sup>a</sup>Number of points left out from full set.

<sup>b</sup>The system that was left out in the actual step.

<sup>c</sup>NHA stands for number of heavy atoms.

<sup>d</sup>NHB stands for number of bonds between heavy atoms.



**Table S15 Values of descriptors used in regression models for binding free energy estimation**

| System   | NHA | NHA/NA | NHB | NHB/NB |
|----------|-----|--------|-----|--------|
| 1abo     | 74  | 0.4837 | 79  | 0.5000 |
| 1axc     | 195 | 0.4912 | 198 | 0.4950 |
| 1bbz     | 75  | 0.5137 | 81  | 0.5329 |
| 1dpp     | 13  | 0.4483 | 12  | 0.4286 |
| 1e4x     | 58  | 0.5321 | 59  | 0.5364 |
| 1hes     | 55  | 0.5670 | 55  | 0.5670 |
| 1jgn     | 169 | 0.4884 | 172 | 0.4928 |
| 1jh4     | 171 | 0.5104 | 176 | 0.5176 |
| 1jyr     | 57  | 0.5327 | 57  | 0.5327 |
| 1kli     | 36  | 0.5625 | 39  | 0.5821 |
| 1klj     | 37  | 0.5441 | 40  | 0.5634 |
| 1kl1     | 33  | 0.5323 | 36  | 0.5538 |
| 1klm     | 36  | 0.5455 | 39  | 0.5652 |
| 1lej     | 106 | 0.5274 | 109 | 0.5343 |
| 1mw4     | 88  | 0.5500 | 91  | 0.5583 |
| 1py1     | 65  | 0.5000 | 64  | 0.4961 |
| 1rlq     | 77  | 0.4753 | 80  | 0.4848 |
| 1sem     | 79  | 0.4731 | 83  | 0.4854 |
| 1tp5     | 56  | 0.4828 | 57  | 0.4872 |
| 2bba     | 115 | 0.5134 | 120 | 0.5240 |
| 2e71     | 76  | 0.5101 | 79  | 0.5197 |
| 2gsi     | 93  | 0.4769 | 95  | 0.4822 |
| 2jm6     | 210 | 0.4817 | 210 | 0.4817 |
| 2ke1     | 80  | 0.4678 | 79  | 0.4647 |
| 2nl9     | 231 | 0.5099 | 236 | 0.5153 |
| 2oi9     | 76  | 0.5101 | 79  | 0.5197 |
| 2qbx     | 107 | 0.5144 | 111 | 0.5236 |
| 2roc     | 225 | 0.5137 | 227 | 0.5159 |
| 2rod     | 205 | 0.5062 | 211 | 0.5134 |
| 2v8c     | 130 | 0.5000 | 144 | 0.5255 |
| 2v8f     | 143 | 0.4799 | 154 | 0.4984 |
| 2x6m     | 76  | 0.5630 | 78  | 0.5693 |
| 3ask     | 112 | 0.4667 | 111 | 0.4644 |
| 3e3q     | 76  | 0.5101 | 79  | 0.5197 |
| 3ptb     | 9   | 0.5000 | 9   | 0.5000 |
| 3ptb_pad | 12  | 0.5455 | 12  | 0.5455 |
| 3ptb_pam | 10  | 0.5000 | 10  | 0.5000 |
| 3ptb_pme | 10  | 0.4762 | 10  | 0.4762 |
| 3ptb_pmo | 11  | 0.5000 | 11  | 0.5000 |
| 3ql9     | 112 | 0.4667 | 111 | 0.4644 |
| 4j9f     | 78  | 0.4968 | 84  | 0.5153 |
| 4j9g     | 77  | 0.5066 | 84  | 0.5283 |
| 4j9i     | 77  | 0.5000 | 82  | 0.5157 |

## References

1. Talhout R, Engberts JBFN. Thermodynamic analysis of binding of p-substituted benzamidines to trypsin. *European Journal of Biochemistry*. 2001;268(6).
2. Payne JW, Grail BM, Gupta S, Ladbury JE, Marshall NJ, O'Brien R, et al. Structural basis for recognition of dipeptides by peptide transporters. *Archives of Biochemistry and Biophysics*. 2000;384(1).
3. Dullweber F, Stubbs MT, Musil D, Stürzebecher J, Klebe G. Factorising ligand affinity: A Combined thermodynamic and crystallographic study of trypsin and thrombin inhibition. *Journal of Molecular Biology*. 2001;313(3).
4. Kaufmann K, Shen N, Mizoue L, Meiler J. A physical model for PDZ-domain/peptide interactions. *Journal of Molecular Modeling*. 2011;17(2).
5. Charifson PS, Shewchuk LM, Rocque W, Hummel CW, Jordan SR, Mohr C, et al. Peptide ligands of pp60(c-src) SH2 domains: A thermodynamic and structural study. *Biochemistry*. 1997;36(21):6283–93.
6. Hahn M, Winkler D, Welfle K, Misselwitz R, Welfle H, Wessner H, et al. Cross-reactive binding of cyclic peptides to an anti-TGF $\alpha$  antibody Fab fragment: An X-ray structural and thermodynamic analysis. *Journal of Molecular Biology*. 2001;314(2).
7. McNemar C, Snow ME, Windsor WT, Prongay A, Mui P, Zhang R, et al. Thermodynamic and structural analysis of phosphotyrosine polypeptide binding to Grb2-SH2. *Biochemistry*. 1997;36(33).
8. He X, Zhu G, Koelsch G, Rodgers KK, Zhang XC, Tang J. Biochemical and Structural Characterization of the Interaction of Memapsin 2 ( $\beta$ -Secretase) Cytosolic Domain with the VHS Domain of GGA Proteins. *Biochemistry*. 2003;42(42).
9. Palencia A, Cobos ES, Mateo PL, Martínez JC, Luque I. Thermodynamic Dissection of the Binding Energetics of Proline-rich Peptides to the Abl-SH3 Domain: Implications for Rational Ligand Design. *Journal of Molecular Biology*. 2004;336(2).
10. Jones LL, Colf LA, Bankovich AJ, Stone JD, Gao YG, Choi MC, et al. Different thermodynamic binding mechanisms and peptide fine specificities associated with a panel of structurally similar high-affinity T cell receptors. *Biochemistry*. 2008;47(47).
11. De Genst EJ, Williams T, Wellens J, Day EM, Waudby CA, Meehan S, et al. Structure and properties of a complex of  $\alpha$ -synuclein and a single-domain camelid antibody. *Journal of Molecular Biology*. 2010;402(2).
12. Wang C, Pawley NH, Nicholson LK. The role of backbone motions in ligand binding to the c-Src SH3 domain. *Journal of Molecular Biology*. 2001;313(4).
13. Ferreon JC, Hilser VJ. Ligand-induced changes in dynamics in the RT loop of the C-terminal SH3 domain of Sem-5 indicate cooperative conformational coupling. *Protein Science*. 2003;12(5).
14. Org T, Chignola F, Hetényi C, Gaetani M, Rebane A, Liiv I, et al. The autoimmune regulator PHD finger binds to non-methylated histone H3K4 to activate gene expression. *EMBO*

Reports. 2008;9(4).

15. Ivancic M, Spuches AM, Guth EC, Daugherty MA, Wilcox DE, Lyons BA. Backbone nuclear relaxation characteristics and calorimetric investigation of the human Grb7-SH2/erbB2 peptide complex. *Protein science*. 2005;14(6):1556–69.
16. Armstrong A, Hildreth JEK, Amzel LM. Structural and thermodynamic insights into the recognition of native proteins by anti-peptide antibodies. *Journal of Molecular Biology*. 2013;425(11).
17. Chrencik JE, Brooun A, Recht MI, Nicola G, Davis LK, Abagyan R, et al. Three-dimensional structure of the EphB2 receptor in complex with an antagonistic peptide reveals a novel mode of inhibition. *Journal of Biological Chemistry*. 2007;282(50).
18. Chung E, Henriques D, Renzoni D, Zvelebil M, Bradshaw JM, Waksman G, et al. Mass spectrometric and thermodynamic studies reveal the role of water molecules in complexes formed between SH2 domains and tyrosyl phosphopeptides. *Structure*. 1998;6(9).
19. Chrencik JE, Brooun A, Kraus ML, Recht MI, Kolatkar AR, Gye WH, et al. Structural and biophysical characterization of the EphB4·EphrinB2 protein-protein interaction and receptor specificity. *Journal of Biological Chemistry*. 2006;281(38).
20. Arita K, Isogai S, Oda T, Unoki M, Sugita K, Sekiyama N, et al. Recognition of modification status on a histone H3 tail by linked histone reader modules of the epigenetic regulator UHRF1. *Proceedings of the National Academy of Sciences of the United States of America*. 2012;109(32).
21. Iwase S, Xiang B, Ghosh S, Ren T, Lewis PW, Cochrane JC, et al. ATRX ADD domain links an atypical histone methylation recognition mechanism to human mental-retardation syndrome. *Nature Structural and Molecular Biology*. 2011;18(7).
22. Kursula P, Kursula I, Massimi M, Song YH, Downer J, Stanley WA, et al. High-resolution Structural Analysis of Mammalian Profilin 2a Complex Formation with Two Physiological Ligands: The Formin Homology 1 Domain of mDia1 and the Proline-rich Domain of VASP. *Journal of Molecular Biology*. 2008;375(1).
23. Kozlov G, De Crescenzo G, Lim NS, Siddiqui N, Fantus D, Kahvejian A, et al. Structural basis of ligand recognition by PABC, a highly specific peptide-binding domain found in poly(A)-binding protein and a HECT ubiquitin ligase. *EMBO Journal*. 2004;23(2).
24. Bruning JB, Shamoo Y. Structural and thermodynamic analysis of human PCNA with peptides derived from DNA polymerase- $\delta$  p66 subunit and flap endonuclease-1. *Structure*. 2004;12(12).
25. Day CL, Smits C, Fan FC, Lee EF, Fairlie WD, Hinds MG. Structure of the BH3 Domains from the p53-Inducible BH3-Only Proteins Noxa and Puma in Complex with Mcl-1. *Journal of Molecular Biology*. 2008;380(5).
26. Horváth I, Jeszenői N, Bálint M, Paragi G, Hetényi C. A fragmenting protocol with explicit hydration for calculation of binding enthalpies of target-ligand complexes at a quantum mechanical level. *International Journal of Molecular Sciences*. 2019;20(18).
27. Yap CW. PaDEL-descriptor: An open source software to calculate molecular descriptors and fingerprints. *Journal of computational chemistry*. 2011;32(7):1466–74.
